1 **Title:** *Recurrent human papillomavirus-related head and neck*  
2 *cancer undergoes metabolic re-programming and is driven by*  
3 *oxidative phosphorylation.*

4 **Authors**

5 Avani Vyas<sup>1,\*</sup>, R. Alex Harbison<sup>2,\*</sup>, Daniel Faden<sup>3</sup>, Mark Kubik<sup>1</sup>, Drake Palmer<sup>4</sup>, Qing Zhang<sup>5</sup>,  
6 Hatice U. Osmanbeyoglu<sup>6,7</sup>, Eduardo Méndez<sup>2</sup>, Umamaheswar Duvvuri<sup>1</sup>

7 **Authors' Affiliations**

8 Departments of <sup>1</sup>Otolaryngology and <sup>6</sup>Biomedical Informatics, University of Pittsburgh School of  
9 Medicine; Department of <sup>4</sup>Biological Sciences, University of Pittsburgh School of Arts &  
10 Sciences; Department of Bioengineering<sup>7</sup>, University of Pittsburgh School of Engineering;  
11 Department of <sup>2</sup>Otolaryngology, University of Washington School of Medicine; Department of  
12 <sup>3</sup>Otolaryngology, Massachusetts Eye and Ear Infirmary; <sup>5</sup>Genomics & Bioinformatics Shared  
13 Resources, Fred Hutchinson Cancer Research Center.

14 \*A.V. and RAH contributed equally to this work.

15 **Running Title**

16 *Recurrent HPV-Related HNSC Metabolic Reprogramming*

17 **Keywords**

18 Human papillomavirus, head and neck cancer, NRF2, oxidative phosphorylation, oropharyngeal  
19 cancer, recurrent cancer

20 **Financial Support**

21 This study is supported by I01 BX-003456, R01 DE028343, R00 CA207871 and the Mosites  
22 Fund for personalized medicine.

23 **Corresponding Author**

24 Umamaheswar Duvvuri, Department of Veterans Affairs, and University of Pittsburgh,  
25 Department of Otolaryngology, 203 Lothrop St., Pittsburgh, PA 15213. Phone: 412-647-2117;  
26 Fax: 412-647-2080; E-mail: [duvvuriu@upmc.edu](mailto:duvvuriu@upmc.edu)

27 **Conflicts of Interest**

28 The authors have no conflicts of interest to declare.

29

30

## 31 **Abstract**

32 Human papillomavirus (HPV) infection drives the development of some head and neck cancer  
33 squamous cell carcinomas (HNSC). This disease is rapidly increasing in incidence worldwide.  
34 Although these tumors are sensitive to treatment, ~10% of patients fail therapy. However, the  
35 mechanisms that underlie treatment failure remain unclear. Here, we show that the oxidative  
36 phosphorylation (OXPHOS) pathway is enriched in recurrent HPV-associated HNSC and may  
37 contribute to treatment failure. Nrf2-enriched HNSC samples from the Cancer Genome Atlas  
38 with enrichment in OXPHOS, fatty acid metabolism, Myc, Mtor, ROS, and glycolytic signaling  
39 networks exhibited worse survival. HPV-positive HNSC cells demonstrated sensitivity to the  
40 OXPHOS inhibitor, IACS-010759, in a Nrf2-dependent manner. Further, using murine xenograft  
41 models, we identified Nrf2 as a driver of tumor growth. Mechanistically, Nrf2 drives ROS and  
42 mitochondrial respiration, and Nrf2 is a critical regulator of redox homeostasis that can be  
43 crippled by disruption of OXPHOS. Nrf2 also mediated cisplatin sensitivity in endogenously  
44 overexpressing primary HPV-related HNSC cells. Cisplatin treatment demonstrated Nrf2-  
45 dependent synergy with OXPHOS inhibition. These results unveil a paradigm shifting  
46 translational target harnessing Nrf2-mediated metabolic reprogramming in HPV-related HNSC.

## 47 Introduction

48 While human papillomavirus (HPV)-related head and neck squamous cell carcinoma  
49 (HNSC) responds favorably to concurrent platinum-based chemoradiation (1), treatment failure  
50 portends a grim prognosis with limited treatment options including morbid surgical resection,  
51 chemotherapy (i.e., with platinum-based agents) and/or reirradiation, or clinical trials mainly with  
52 immunotherapeutic agents (2). From a public health standpoint, the incidence of HPV-related  
53 HNSC has surpassed that of cervical cancer and is projected to continue rising until at least  
54 2060 (3,4). Given the ongoing rise in HPV-related HNSC and challenges of managing treatment  
55 non-responders, it is critical to understand the biological mechanisms underlying recurrent HPV-  
56 related HNSC so that we may mitigate recurrence at the time of initial therapy.

57 To better understand the signaling the mechanisms that drive recurrent HPV-related  
58 HNSC, our group sought to identify differences in the genomic landscapes between  
59 metachronous recurrent and primary HPV-related HNSCs (5). We had previously shown that  
60 metachronous recurrent HPV-related HNSCs shared a genomic landscape with aggressive  
61 smoking- and alcohol-associated (HPV-unrelated) HNSCs. A subsequent study using gene  
62 expression data, identified a subset of primary HPV-related HNSCs that exhibited a poor  
63 treatment response and shared molecular similarities with HPV-unrelated HNSCs (6). In  
64 comparison, findings from our prior genomic analysis revealed gene mutations exclusive to  
65 primary HPV-related HNSCs that recurred relative to primary HPV-related HNSC cases that did  
66 not recur (i.e., *NFE2L2*, *TSC2*, *BRIP1*, and *NBN*). Genomic alterations of HPV-unrelated  
67 HNSCs, as characterized by the Cancer Genome Atlas (TCGA) study include loss-of-function  
68 *TP53* mutations and *CDKN2A* inactivation in addition to a key, and underappreciated, role of the  
69 transcription factor *NFE2L2* (the gene which encodes Nrf2) (7). *NFE2L2* plays a role in  
70 regulating oxidative stress and mitigating the efficacy of chemoradiation (8) and interacts with  
71 the HPV E1 protein (9).

72           While prior work has focused on uncovering the molecular characteristics of primary  
73 HPV-related HNSC that portend a poor prognosis, we continue to experience a paucity of  
74 treatment options in the management of recurrent disease that tend to have high morbidity. In  
75 this study, we sought to elucidate targetable biological mechanisms underlying recurrent HPV-  
76 related HNSC. Our overarching hypothesis was that HPV-related HNSCs would demonstrate  
77 differential expression in key signaling pathways which may be exploited as therapeutic targets.  
78 Intriguingly, we observed activation of the OXPHOS pathway in the background of metabolic  
79 gene dysregulation among matched patient samples from primary and subsequent  
80 metachronous recurrent tumors. We further confirmed that Nrf2 functions as a driver of growth  
81 in an OXPHOS-dependent manner in HPV-associated HNSC. *In vitro* findings illustrated a  
82 functional dependence on OXPHOS and ROS among Nrf2-overexpressing cells conferring a  
83 critical weakness to OXPHOS inhibition. Taken, together, these findings implicate Nrf2 and  
84 OXPHOS as drivers of a subset of HPV-associated HNSC and raise the intriguing possibility  
85 that Nrf2 may serve as a novel therapeutic target in this subset of patients.

86

## 87 Results

88 *Patient Characteristics.* Starting with ten patients with matched primary (pOPSCC) and  
89 metachronous recurrent HPV-related oropharyngeal squamous cell carcinoma (rOPSCC) from  
90 the University of Pittsburgh, our first aim was to identify transcriptional differences between the  
91 pOPSCC and rOPSCC to gain mechanistic insight into the evolutionary adaptations of  
92 metachronous recurrent tumors (**Figure 1A**). The median age of the cohort was 60 years old  
93 (**Supplemental Table 1**). Based on the AJCC 8<sup>th</sup> edition staging manual (10), seven of ten  
94 patients presented with stage I disease and three out of ten with stage II disease. Of the 10  
95 patients in the cohort, six were never smokers, three patients had a greater than 10 years  
96 smoking history, and one patient had a 15-year history of chewing tobacco use. Median overall  
97 survival was 36.4 months among the cohort.

98 *Nrf2 and OXPHOS signaling pathways are enriched in metachronous recurrent HPV-related*  
99 *OPSCCs.* PANTHER pathway analysis revealed a preponderance of biological processes  
100 involved with biosynthesis, metabolism, oxidative phosphorylation (OXPHOS), and Wnt  
101 signaling (FDR  $q < 0.05$ ; **Figure 1B**). To further understand the mechanisms driving recurrent  
102 OPSCC, we performed gene set enrichment analysis (GSEA) utilizing pre-specified metabolic  
103 and oncogenic gene sets (**Supplemental Tables S2 and S3**) based on our prior research (5)  
104 and *a priori* knowledge of HPV-unrelated HNSC biology. This demonstrated selective  
105 enrichment of OXPHOS pathways among the rOPSCCs for the metabolic gene sets (FDR  $q <$   
106  $0.25$ ; **Figure 1C**, *upper panel*). In the oncogenic GSEA, rOPSCCs were enriched in Myc, p53-  
107 dependent DNA damage repair, and Nrf2 core signaling (11) pathways (FDR  $q < 0.25$ ; **Figure**  
108 **1C**, *lower panel*). Myc plays a critical role in regulating both glycolysis and OXPHOS. Nrf2  
109 canonically regulates the antioxidant response element (ARE) genes in response to oxidative  
110 stress but also plays a critical role in OXPHOS. We next performed hierarchical clustering of

111 expression data restricted to genes from the hallmark OXPPOS gene set revealing two main  
112 clusters (**Figure 1D**, *left panel*). One cluster included eight of the ten rOPSCCs while the  
113 second cluster was populated by six of the ten pOPSCCs. To assess for genomic correlations  
114 with OXPPOS gene expression in these data, we performed single sample GSEA (ssGSEA) on  
115 the paired primary and recurrent tumor samples using oncogenic gene sets that were  
116 significantly enriched among the rOPSCCs (**Figure 1D**, bars above main heatmap). We also  
117 performed ssGSEA using the Hallmark fatty acid metabolism gene set which was enriched in  
118 the metabolic GSEA and Hallmark reactive oxygen species hypothesizing that these genes  
119 would be associated with Nrf2 target gene expression. We compared the enrichment scores  
120 between the primary and recurrent tumors for each gene set and observed significantly greater  
121 enrichment scores among the rOPSCCs for the Nrf2, fatty acid metabolism, and Myc gene sets  
122 (Wilcoxon rank-sum  $p < 0.05$ ; **Figure 1D**, *right panel*; **Supplemental Figure 1**). In addition, we  
123 performed a molecular subtype analysis to assess correlation between the primary and  
124 recurrent OPSCCs with previously defined centroids (12) hypothesizing that the rOPSCCs  
125 would share characteristics with the classical (i.e., smoking-related) subtype. We found that  
126 eight of the ten rOPSCCs clustered with classical (4/10) or mesenchymal (4/10) mRNA  
127 subtypes while the majority of pOPSCCs clustered with the atypical (5/10) or basal subtypes  
128 (2/10; **Figure 1D**, *left panel*).

129 To further assess context-specific gene regulatory networks that may be enriched or  
130 diminutive in rOPSCCs, we inferred transcription factor (TF) activities based on RNA-seq data  
131 (13). We observed a significant increase in *E2F3* and *SMAD3* activity among the rOPSCCs  
132 (Wilcoxon rank-sum,  $p < 0.05$ ; **Supplemental Figure 2**). *BACH1/NFE2/NFE2L2* activity was  
133 increased in the rOPSCCs though not statistically significantly (Wilcoxon rank-sum,  $p = 0.062$ ).  
134 *PKNOX1/TGIF2* activity was significantly decreased among the rOPSCCs (Wilcoxon rank-sum,  
135  $p = 0.006$ ). Interestingly, Nrf2 activation contributes to epithelial-mesenchymal transition (EMT)

136 by mediating a decrease in E-cadherin and stimulating TGF- $\beta$ 1-induced *SMAD2/3* activity (14).  
137 In turn, TGF- $\beta$  signaling is involved in stimulating both glycolysis and mitochondrial respiration.  
138 As *TGIF2* represses transcription of TGF- $\beta$ -responsive genes by recruiting histone deacetylases  
139 (15), it follows that the *TGIF2* signaling network was decreased in the rOPSCCs while *SMAD3*  
140 activity was increased.

141 *Nrf2 activation portends worse survival among HPV-related HNSCs.* To investigate the effect of  
142 *Nrf2* in a separate cohort, we utilized the TCGA head and neck cancer data (7). With a set of 99  
143 HPV-positive TCGA HNSC samples, we performed a survival analysis stratified by *Nrf2* or *Myc*  
144 genomic alteration status defined as expression > 2, mutated, or copy number gain or  
145 amplification. Mutation status was included given that *Nrf2* and *Myc* somatic variants in the  
146 TCGA HNSC data are either characterized oncogenic hotspot mutations or predicted to have a  
147 functional impact. Surprisingly, we identified a significant difference in survival among the *Nrf2*-  
148 altered (*Nrf2 Up*) samples (log-rank test,  $p = 0.005$ ) versus no difference in survival among the  
149 *Myc*-altered (*Myc Up*) samples (log-rank test,  $p = 0.16$ ; **Figure 2A**). These data suggest that  
150 *Nrf2*, but not *Myc*, may functionally drive OXPHOS in HPV-associated HNSC. Next, we sought  
151 to identify if there were signaling network-level relationships with survival among the TCGA  
152 HPV-related HNSC samples.

153 We performed clustering analyses on the TCGA expression data selecting genes within  
154 gene sets of interest using the Consensus Cluster Plus algorithm. Cluster assignments were  
155 used for stratified survival analyses. Then, single sample GSEA was performed to quantify  
156 enrichment scores of tumor samples allowing us to infer the correlation between a respective  
157 cluster gene set enrichment and survival (e.g., high enrichment with worse survival). Using the  
158 Singh *NFE2L2* targets gene set (16) for clustering the TCGA HPV-related HNSC expression  
159 data, we found a significant difference in survival with the *Nrf2*-enriched cluster (*Nrf2 Up*)  
160 conferring worse survival (log-rank test,  $p = 0.00016$ ; **Figure 2B**). When controlling for *Nrf2*

161 enrichment cluster, age, and stage, the Nrf2-enriched status conferred a 5.13-fold (Hazard ratio  
162 95% CI: 2.02 – 13.0;  $p < 0.001$ ) increased risk of mortality (**Figure 2C**). GSEA using the  
163 Hallmark gene sets was performed comparing the Nrf2-altered vs -unaltered TCGA HPV-related  
164 HNSC tumors as defined by genomic alteration status in **Figure 2A**. Interestingly, Nrf2-altered  
165 tumors featured enrichment in *MYC*, *MTOR*, fatty acid metabolism, OXPHOS, ROS,  
166 peroxisome, and glycolysis gene sets suggesting a relationship between Nrf2 and critical  
167 metabolic signaling pathways (**Figure 2D**).

168 While Nrf2 appeared to play an integral role in the metachronous recurrent setting, we  
169 were interested in testing for an independent or synergistic effect of Nrf2 transcriptional targets  
170 and other critical metabolic regulatory genes on survival. We performed a survival analysis  
171 among the TCGA HPV-positive HNSC tumors stratified by Nrf2 genomic alteration status in  
172 combination with *Hmox1*, *Nqo1*, or *Sqstm1* genomic alterations (defined by gene expression  $>$   
173 2, copy number gain or amplification). Interestingly, combined Nrf2- and *Hmox1*-altered tumors  
174 had the worst survival among the Nrf2  $\pm$  *Hmox1* alteration group while Nrf2-altered in  
175 combination with *Nqo1*- or *Sqstm1*-altered tumors did not represent the worst survival in their  
176 respective strata (**Supplemental Figure 3**). We also tested if *Hmox1*, *Nqo1*, or *Sqstm1*  
177 upregulation had an independent association with survival among the TCGA HPV-related  
178 HNSCs. Only tumors with upregulation of *Hmox1* had statistically significantly worse survival  
179 compared to those without *Hmox1* upregulation (**Supplemental Figure 4**). These data implicate  
180 OXPHOS as a metabolic driver of HPV-related HNSC and suggest that recurrent/metastatic  
181 tumors co-opt this pathway during disease progression.

182 We further tested this hypothesis by evaluating the effect on survival based on metabolic  
183 and oncogenic signaling network genomic alterations among the TCGA HPV-related HNSC  
184 samples. We performed clustering on the expression data followed by survival analyses  
185 stratified by cluster. Single sample GSEA was used to assess cluster enrichment as described



186 above for gene sets including OXPPOS, ROS, fatty acid metabolism, DNA damage response,  
187 and Myc. These gene sets were included as they were significantly enriched in the Pittsburgh  
188 recurrent tumors. The ROS gene set was tested as it includes genes involved in oxidative stress  
189 response. Interestingly, clusters with the greatest enrichment did not confer the worst survival  
190 among the OXPPOS and ROS gene sets (**Supplemental Figure 5 and 6**). Similarly, clusters  
191 with the highest enrichment among the fatty acid metabolism, DNA damage response, and Myc  
192 gene sets did not exhibit the worst survival (**Supplemental Figure 7 and 8**). We repeated the  
193 above survival analyses in the TCGA HPV-unrelated (i.e., smoking-related) HNSC samples.  
194 There was not a significant difference in survival when stratified by Nrf2- or Myc-altered or gene  
195 set cluster status (data not shown). However, there was a significant difference in survival when  
196 stratified by OXPPOS cluster status (data not shown). Taken together, our genomic analyses  
197 identify an association between Nrf2 and metabolic reprogramming with the development and  
198 progression of HPV-related HNSC. Thus, we sought to characterize the mechanisms by which  
199 Nrf2 drives tumorigenesis in HPV-related head and neck cancer.

200 *Nrf2 promotes cell proliferation in HPV-positive HNSC cell lines.* Next, we sought to investigate  
201 the effect of Nrf2 overexpression on growth in HPV-related HNSC cell lines given findings in  
202 our rOPSCC and the TCGA HPV-related HNSC data which suggested that Nrf2 is involved with  
203 recurrence and worse overall outcomes, respectively. In order to establish a stable Nrf2  
204 overexpressing cell line, HPV-16-positive UMSCC47 and UPCI-SCC90 were infected with a  
205 Nrf2-expressing retrovirus (murine stem cell virus [MSCV]-Nrf2). These cell lines were chosen  
206 given their minimal endogenous Nrf2 expression (**Supplemental Figure 9A**). The efficacy of  
207 Nrf2 overexpression was assessed by performing qRT-PCR (**Figure 3A**) on exponentially  
208 growing cells in different passages. The proliferative potential of Nrf2 upregulation in these cells  
209 was measured by WST-1 (data not shown) and a colony formation assay (CFA; **Figure 3B**). To  
210 test the effect of Nrf2 knockdown on cell growth, we utilized an HPV-16-positive cell line with

211 increased endogenous expression of Nrf2 (93VU147T). We transiently knocked down Nrf2  
212 using short interfering RNA (siRNA) and measured the growth index using a CFA (area of CFA  
213 for siNrf2 relative to control: ~50%,  $p = 0.01$ ,  $n = 2$ , **Figure 3C**). To assess the effect of an  
214 exogenous Nrf2 inhibitor, we treated 93VU147T cells with the coffee alkaloid, trigonelline (trig),  
215 observing attenuated proliferation (67% proliferation with trig relative to control,  $n = 3$ ,  $p <$   
216  $0.0001$ ; data not shown).

217 Nrf2 has recently emerged as a key regulator of mitochondrial function. Mitochondria  
218 generate ATP through OXPHOS which is the primary energy source of cells in their basal state.  
219 In contrast, dividing cells including tumors and activated lymphocytes utilize aerobic glycolysis  
220 to optimize substrate production for generating new cells. However, our transcriptional analyses  
221 suggested a predilection for OXPHOS gene expression in tumors with poor survival  
222 characteristics. Therefore, we tested IACS-01759 (IACS), a potent and selective electron  
223 transport chain complex I inhibitor which is currently in phase I trials. IACS in nM concentrations  
224 was significantly more cytotoxic to UMSCC47-Nrf2 cells ( $IC_{50}=1.6nM$ ) compared to Neo cells  
225 ( $IC_{50}=8.9 nM$ ,  $n=3$ , **Figure 3D**).

226 We confirmed the inhibition of cell proliferation by IACS in another cell line harboring  
227 stably expressed Nrf2 in UPCISCC90 cells (**Figure 3E**; **Supplemental Figure 9A and B**).  
228 To further evaluate the role of OXPHOS in cellular proliferation, we tested the effect of rotenone  
229 via CFA in UPCISCC90-Neo and -Nrf2 cells (data not shown). Rescuing the cells from rotenone  
230 after 2h treatment was irreversible in the Nrf2-dependent cells and the cells failed to form  
231 colonies even after 10 days in culture.

232 The mitochondrial toxin, rotenone, also inhibited cellular proliferation in a Nrf2-  
233 dependent manner within 2h treatment at a low dose of  $0.1\mu M$  (data not shown). This effect was  
234 more pronounced in the Nrf2-overexpressing cells, as observed at 24h (~30% reduction,  
235 \*\*\* $p<0.0001$ ,  $n=3$ ; **Figure 3F**). A comparison of  $IC_{50}$  values in different Nrf2-overexpressing cell

236 lines (**Supplemental Figure 9C**) suggests that Nrf2 upregulated cells are heavily reliant on  
237 OXPPOS for growth and survival in contrast to Nrf2 basal cells. Taken together, these data infer  
238 that Nrf2 promotes cell proliferation in an OXPPOS-dependent manner in HPV-positive HNSC.

239 *Nrf2 overexpressing xenografts exhibit enhanced growth.* The *in vivo* effect of UMSCC47 stably  
240 expressing Nrf2 and Neo was assessed in a NOD SCID mouse model. Cells were injected into  
241 both flanks and allowed to establish for a week. The mean tumor weight and volume increased  
242 significantly over time in the mice implanted with Nrf2 cells relative to Neo. At day 21 post-  
243 implantation, the tumor length and width had reached more than 20 mm in the Nrf2 xenografts.  
244 The Nrf2 expressing tumors had 3-fold greater tumor weight at time of harvest ( $p < 0.05$ ,  $n = 3$   
245 or 4, **Figure 4A** and **4B**). The tumor volume of Nrf2 overexpressing cells amplified by 3.5-fold at  
246 day 7 ( $p < 0.05$ ), 6-fold at day 14, and 14-fold at day 21 ( $p < 0.0001$ ; **Figure 4C**). These data  
247 advocate that Nrf2 expressing tumors have enhanced proliferative advantage over the low-Nrf2  
248 expressing tumors.

249 *Nrf2 activation upregulates mitochondrial respiration in a ROS-dependent manner.* In order to  
250 gain insight into the redox balance modulated by Nrf2 overexpression among HPV-positive  
251 HNSC cell lines, we measured markers of oxidative stress among control and Nrf2  
252 overexpressing conditions hypothesizing that Nrf2 overexpression would abrogate oxidative  
253 stress. Given that ROS are a natural byproduct of mitochondrial respiration and that OXPPOS  
254 was increased in Nrf2-overexpressing cells in our prior experiments, we sought to investigate  
255 the impact of ROS on mitochondrial respiration. Nrf2-overexpressing cells demonstrated  
256 increased expression of the cytoprotective and detoxifying genes, heme oxygenase 1 (*HMOX1*)  
257 and NAD(P)H:quinone oxidoreductase-1 (*NQO1*) in UMSCC47 (3- and 5-fold, respectively;  $p$ -  
258 value  $< 0.05$ ,  $n=3$ ; **Figure 5A**) and UPCISCC90 cells (25- and 40-fold respectively;  
259 **Supplemental Figure 10A**). The amplification of *HMOX1* and *NQO1* were also confirmed in a

260 Nrf2-enriched primary HPV-positive HNSC cell line (UPCI-UDSCC17-70; **Supplemental Figure**  
261 **9D**).

262 To quantify relative ROS production in Nrf2-enriched cells, we measured hydrogen  
263 peroxide ( $\text{H}_2\text{O}_2$ ) and superoxide ( $\text{O}_2^{\cdot-}$ ) formation in intact and live cells using the Amplex Red  
264 and MitoSOX assays, respectively. We used the free radical scavenger *N*-acetylcysteine (NAC)  
265 to test the effect of abrogating ROS in Nrf2-enriched and Nrf2-basal cells. The basal rate of  
266 ROS production in UMSCC47-Nrf2 was almost double compared to parental cells as measured  
267 by the Amplex Red assay ( $p$ -value  $< 0.001$ ,  $n=3$ ; **Figure 5B**, *left panel*). NAC decreased ROS  
268 production to a greater degree in the Nrf2-overexpressing UMSCC47 cells (by ~60 and 70%  
269 respectively,  $p$ -value  $< 0.0001$ ,  $n=3$ ) relative to Neo diminishing ROS to basal levels. NAC did  
270 not significantly decrease ROS in cells expressing empty vector (**Figure 5**, *left panel*).

271 Next, we used MitoSOX Red in live cells to detect mitochondrial superoxide formation as  
272 an additional tool to quantify ROS production as a function of Nrf2 expression status. The  
273 results from combined data ( $n=3$ ) indicate 50% more MitoSOX in Nrf2-enriched UMSCC47 cells  
274 compared to control cells ( $p$ -value  $< 0.05$ ,  $n=3$ ; **Figure 5B**, *right panel*). There was a significant  
275 reduction in MitoSOX levels in the Nrf2-overexpressing cells treated with NAC (~50%), but no  
276 significant changes between NAC versus control in Neo cells (**Figure 5B**, *right panel*). The Nrf2  
277 inhibitor, trigonelline, decreased ROS and mitochondrial function in 93VU147T and UMSCC47-  
278 Neo and Nrf2 cells (data not shown) corroborating the role of Nrf2-mediated OXPHOS  
279 reprogramming and ROS signaling.

280 To further understand the sequelae of Nrf2-mediated OXPHOS reprogramming, we  
281 assessed the effect of Nrf2 overexpression on mitochondrial function by measuring ATP  
282 production and mitochondrial membrane potential. Compared to Neo cells, the Nrf2-  
283 overexpressing UMSCC47 cells exhibited ~1.7-fold higher ATP production which was mitigated  
284 after treatment with rotenone ( $p < 0.001$ ), IACS (~65% decrease,  $p < 0.0001$ ), and FCCP (~40%

285 decrease,  $p < 0.0001$ ,  $n=3$ ; **Figure 5C**, *left panel*). Next, we measured mitochondrial membrane  
286 potential in live cells using cell permeable tetramethylrhodamine ethyl ester (TMRE). The  
287 mitochondrial membrane potential is generated by proton pumps and is an essential component  
288 of energy storage during OXPHOS. The control UMSCC47-Nrf2 cells had greater TMRE  
289 fluorescence than control Neo cells (by ~35%,  $p < 0.0001$ ), but this difference was mitigated  
290 significantly by the use of IACS or rotenone in the Nrf2-enriched cells (~50%,  $p < 0.0001$ ,  $n=3$ ;  
291 **Figure 5C**, *right panel*). Similarly, FCCP significantly decreased the mitochondrial membrane  
292 potential by 75% in the Nrf2 cells ( $p < 0.0001$ ; **Figure 5C**, *right panel*). In contrast, ATP  
293 production and mitochondrial membrane potential in the Neo cells treated with IACS, rotenone,  
294 or FCCP were not significantly different compared to the control Neo cells.

295 To elucidate whether mitochondrial respiration in Nrf2 cells is dependent on ROS, we  
296 tested the effect of a free radical scavenger, NAC, on ATP production and mitochondrial  
297 membrane potential. NAC abrogated 70% ( $p < 0.0001$ ,  $n=3$ ; **Figure 5D**, *left panel*) of ATP  
298 production in Nrf2 cells, diminishing ATP production to that observed in Neo cells. In contrast,  
299 ATP levels were unchanged in Neo cells after NAC exposure (**Figure 5D**, *left panel*).  
300 Mitochondrial membrane potential did not change significantly after NAC treatment in Nrf2 cells  
301 exhibiting a ~30% decrease relative to control Nrf2 cells (**Figure 5D**, *right panel*). To confirm  
302 these findings were not exclusive to the UMSCC47 cell line, we repeated these experiments in  
303 the UPCISCC90 cell line stably overexpressing Nrf2 or empty vector. The results were  
304 consistent with the above findings (**Supplemental Figure 10**). Overall, these data suggest that  
305 increased ROS in the context of Nrf2 overexpression is not only a collateral phenomenon but  
306 may represent a positive feedback mechanism promoting OXPHOS.

307 *Nrf2-overexpression confers cisplatin sensitivity synergistically with OXPHOS inhibition in HPV-*  
308 *positive HNSC cells*. Prior studies have demonstrated that Nrf2 can mediate resistance to  
309 chemotherapeutic agents including cisplatin (17-20). However, to the best of our knowledge, the

310 role of NRF2 in HPV-related HNSC has not been studied. Since cisplatin is commonly used in  
311 the definitive or adjuvant setting in the treatment of HPV-related HNSC, we sought to investigate  
312 the effect of Nrf2 on cisplatin sensitivity in our models. Thus, we investigated the dose-  
313 dependency of cisplatin on cell proliferation comparing cells with endogenously elevated Nrf2 to  
314 those with genetically knocked-down Nrf2. The data shown in **Figure 6A** (n = 3) indicate that  
315 Nrf2 repression yields a ~7-fold lower IC<sub>50</sub> of cisplatin in 93VU147T cells. Similar results were  
316 obtained using a primary cancer cell line (UPCI:UDSCC17-70) harboring endogenously  
317 elevated Nrf2 expression with or without siNrf2 (**Figure 6B**). Nrf2 knockdown was confirmed by  
318 qRT-PCR (**Figure 6B, left panel**). In siNrf2 cells treated with cisplatin, a 2.2-fold decrease in the  
319 IC<sub>50</sub> was observed compared to control (n = 2, **Figure 6B, right panel**). As cisplatin induces  
320 oxidative stress, we hypothesized that co-treatment with IACS would be synergistically  
321 cytotoxic. To test this hypothesis, we treated UMSCC47-Neo and Nrf2 cells with cisplatin alone  
322 (CDDP) or in combination with IACS (**Figure 6C**). The combination synergistically sensitized the  
323 Nrf2 cells but not the Neo cells. Synergistic inhibition of growth was also observed with the  
324 combination of a Nrf2 inhibitor, trigonelline, and cisplatin in 93VU147T cells (data not shown).  
325 However, trigonelline was not as potent as IACS. These data indicate that Nrf2-overexpression  
326 mediates a delicate balance between ROS and antioxidant production through OXPHOS  
327 reprogramming suggesting a targetable weakness in Nrf2-enriched head and neck cancer.

## 328 Discussion

329 The principal findings of this study were two-fold. First, gene expression analyses of  
330 paired metachronous recurrent versus primary HPV-related HNSCs demonstrated enrichment  
331 of the Nrf2 and OXPHOS signaling pathways amidst a milieu of metabolic gene dysregulation  
332 specific to the metachronous recurrences. Second, murine xenograft and *in vitro* analyses of  
333 HPV-related HNSC revealed Nrf2-dependent cellular proliferation. Further, we identified Nrf2-  
334 mediated OXPHOS dependency and sensitization to mitochondrial complex I inhibition with  
335 IACS-010759. Lastly, we found translational potential in Nrf2-mediated synergy between  
336 cisplatin and OXPHOS inhibition. Thus, targeting OXPHOS in Nrf2-mediated recurrent HPV-  
337 related HNSC in conjunction with cisplatin therapy may provide a synergistic precision target for  
338 improving oncologic outcomes in this devastating disease.

339 Recurrent HPV-related HNSC portends a poor prognosis (2). Previous research  
340 identified a predilection for alteration of oxidative stress genes (*KEAP1*, *NFE2L2*, or *CUL3*)  
341 among head and neck cancers of the classical subtype (7) and an association with poor survival  
342 in laryngeal SCC (21). The mesenchymal subtype has been associated with increased  
343 expression of innate immunity genes and a higher risk of nodal metastasis in oral cavity SCC  
344 (21). We found that 8/10 of the rOPSCCs were of the classical or mesenchymal subtype. In  
345 contrast, the majority of pOPSCCs were of the atypical or basal subtypes. The atypical subtype  
346 is associated with HPV-positive HNSC and activating mutations in exon 9 of the *PIK3CA* helical  
347 domain. The basal subtype is associated with *NOTCH1* inactivation and decreased *SOX2*  
348 expression.

349 Current treatment paradigms for recurrent head and neck cancer are limited and highly  
350 morbid. For resectable locoregional recurrence in the radiation therapy-naive patient, National  
351 Comprehensive Cancer Network (NCCN) guidelines (22) recommend surgery with adjuvant

352 therapy depending on pathologic features versus multimodality chemoradiation. However, most  
353 patients (~95%) with HPV-related HNSC will already have received upfront radiation therapy  
354 administered as monotherapy or part of multimodality therapy (23). Balancing treatment  
355 morbidity with sound oncologic outcomes in previously irradiated patients is much more  
356 challenging. Treatment options include monotherapy or multimodality therapy with a  
357 combination of surgical extirpation, reirradiation, and/or systemic therapy versus palliative  
358 therapy or supportive care in some cases. Surgical management not infrequently entails morbid  
359 extirpation to ensure appropriate oncologic margins. Re-irradiation is associated with rates of  
360 grade  $\geq 3$  toxicity in close to 50% of patients (24) and increases the risk of adverse sequelae  
361 such as osteo- or soft-tissue necrosis. Thus, novel alternative therapeutic approaches should be  
362 explored.

363 Nrf2 is a biological double-edged sword acting both as a tumor suppressor and  
364 oncogene in part by regulating redox homeostasis which is a delicate balance. Nrf2 functions as  
365 a transcriptional regulator of antioxidant response element (ARE) genes and modulates  
366 mitochondrial function and OXPHOS efficiency abrogating the effect of ROS (25,26). Nrf2  
367 affects the efficiency of OXPHOS (25) by raising the basal mitochondrial membrane potential,  
368 basal ATP levels, and oxygen consumption rates (27) while knockdown of Nrf2 decreases  
369 oxygen consumption and ATP production in cancer cells (28). Nrf2 provides substrate for  
370 OXPHOS and regulates the expression of complex IV cytochrome *c* oxidase subunits as well as  
371 nuclear respiratory factor 1 which regulates the expression of respiratory complexes (27,29-34).  
372 While protecting cells from oxidative stress, constitutive activation in multiple cancers promote a  
373 pro-survival phenotype through transcriptional induction of ROS-neutralizing and cytoprotective  
374 drug metabolizing enzymes (35).

375 Activation of the Nrf2 pathway induces expression of proteins involved in xenobiotic  
376 metabolism and clearance, inhibition of inflammation, repair and removal of damaged proteins,



377 as well as transcription and activation of growth factors (36) – thus permitting cells to acquire  
378 features for therapeutic resistance. Upregulation of the Nrf2-mediated survival pathway protects  
379 tumor cells from chemotherapeutic agents including etoposide, doxorubicin and cisplatin  
380 (17,19,37,38). Constitutive activation of Nrf2 accelerates recurrence and induces metabolic  
381 reprogramming to re-establish redox homeostasis and upregulate *de novo* nucleotide synthesis  
382 in breast cancer cells (11). Ultimately this acquired Nrf2 activation confers lowered cancer  
383 therapeutic efficacy and materialization of therapeutic resistance. While much has been  
384 uncovered about the role of Nrf2 in therapeutic resistance, there is ample room for deepening  
385 our understanding of the mechanisms underlying this phenomenon.

386 Our *in vitro* and *in vivo* work describe for the first time, that Nrf2 drives the proliferation of  
387 HPV-driven cancers. Prior studies have found similar results. For example, Keap<sup>-/-</sup> cells  
388 proliferate faster than parental cells while Nrf2<sup>-/-</sup> cells proliferate more slowly (39,40) modulated  
389 by variation in growth factors (36). The Nrf2 gene contains a 12-O-tetradecanoylphorbol-13-  
390 acetate (TPA) response element (TRE) in its promoter (41) which is a binding site for the AP-1  
391 transcription factor, an important modulator of cell proliferation where multiple oncogenic signals  
392 converge (42). Oncogenic proteins that regulate proliferation such as *KRAS*, *BRAF* and *MYC*  
393 increase the expression of Nrf2 (41,43), which corroborates our findings. In addition to  
394 regulating cell proliferation, Nrf2 plays a critical role in mitochondrial physiology and biogenesis  
395 in the context of other critical metabolic regulatory genes including *Myc*.

396 Mitochondrial respiration depends on Nrf2 activity. We found that complex I inhibitors  
397 IACS-010759 and rotenone decrease ATP production in Nrf2 overexpressing cells indicating a  
398 role for Nrf2 in mitochondrial respiration. These OXPHOS inhibitors also decreased cellular  
399 proliferation in a Nrf2-mediated manner indicating a Nrf2-dependent relationship between  
400 OXPHOS and the cell cycle. This suggests that in context of Nrf2 overexpression, glucose  
401 consumption and energy demand needs are met in part through activating OXPHOS.  
402 Abundance of Nrf2 also led to increased ROS production which may independently trigger

403 cellular proliferation (44-46). Inhibition of mitochondrial respiration with NAC suggests that ROS  
404 is not only a byproduct of OXPHOS but also acts in a positive feedback mechanism to regulate  
405 OXPHOS.

406 In this study, we identified gene expression enrichment of Nrf2, OXPHOS, Myc, fatty  
407 acid metabolism, and DNA damage response signaling among metachronous recurrent HPV-  
408 related HNSCs. Prior work demonstrated that Myc activation reprograms cancer cell metabolism  
409 by activating genes involved with glycolysis, glutaminolysis, and mitochondrial biogenesis (47).  
410 Moreover, a substantial body of evidence illustrates the effect of Nrf2 in driving mitochondrial  
411 membrane potential, mitochondrial biogenesis, fatty acid oxidation, and OXPHOS (25,27,48,49).  
412 This led us to query existing datasets for a relationship between these pathways and overall  
413 survival. One group found an Nrf2-related gene expression signature associated with poor  
414 survival among the TCGA head and neck squamous cell carcinoma (HNSC) data and in  
415 multiple non-small cell lung cancer cohorts (50,51). Moreover, our analysis of the TCGA HNSC  
416 data re-capitulated and expanded upon these findings in that we observed a survival difference  
417 dependent on Nrf2 dysregulation at the genomic and pathway levels. In contrast, we did not  
418 identify a survival difference among the TCGA HPV-related HNSCs when stratified by Myc gene  
419 dysregulation, though at the Myc pathway level, there was an association with pathway  
420 enrichment and worse survival. This finding is not surprising in the context of the key role Myc  
421 plays as an oncogene including in the dysregulation of cell metabolism. OXPHOS pathway  
422 dysregulation was significantly associated with survival among the TCGA HPV-related HNSCs,  
423 though the group with the worst survival had an intermediate level of OXPHOS pathway  
424 enrichment. Lastly, GSEA of the Nrf2-upregulated TCGA HPV-related HNSCs demonstrated  
425 enrichment in OXPHOS signaling, glycolysis, fatty acid metabolism, *MYC*, *MTOR*, and ROS  
426 signaling pathways suggesting an interaction among these metabolic signaling pathways in  
427 Nrf2-altered tumors that ultimately converge on increase tumor cell fitness and worse overall  
428 patient survival.

429 To our knowledge, this is the first report identifying Nrf2-dependent OXPHOS inhibitor  
430 sensitization in head and neck cancer, a potential targetable lynchpin. Several studies have  
431 illustrated a role for either OXPHOS or Nrf2 in tumorigenesis. Nrf2 dysregulation in an  
432 esophageal cancer model demonstrated an association with increased cell proliferation and  
433 altered metabolism (52). Prior work analyzing the HPV-host protein network identified an HPV  
434 E1-KEAP1 interaction that phenocopies inactivating mutations in the KEAP1-Nrf2 pathway  
435 leading to the expression of cytoprotective genes (9). On the other hand, OXPHOS drives  
436 treatment resistance independent of Nrf2 as prior research in human ovarian cancer suggests  
437 that oxidative phosphorylation promotes platinum-based chemoresistance (53). Genomic  
438 analysis of mantle cell lymphoma found that metabolic reprogramming towards OXPHOS and  
439 glutaminolysis is associated with resistance to ibrutinib, and that resistance was overcome with  
440 OXPHOS inhibition via IACS-010759 (54). Complex I inhibition via IACS-010759 also delays  
441 regrowth of neoadjuvant chemotherapy-resistant triple-negative breast cancer (55). Lastly,  
442 complex I activity can signal antioxidant response through ROS-independent mechanisms using  
443 ERK5 as a signaling mediator (56). Taken together, there is much to be understood regarding  
444 the interaction of Nrf2 and OXPHOS in the overall metabolic signaling milieu and their role in  
445 treatment resistance. Our study illustrates Nrf2-dependent sensitization to OXPHOS inhibition.

446 Limitations of the current study include accounting for the impact of tumor heterogeneity  
447 on our expression results. Head and neck cancers harbor genomic heterogeneity accounting in  
448 part for their ability to resist our current treatment regimens (57). It is possible that other  
449 genomic, epigenomic, or virally-mediated (9) mechanisms are driving recurrence aside from  
450 those identified in our differential expression and gene set enrichment analyses and that we are  
451 capturing a subset of highly expressed genes in certain tumor clones. For example, the  
452 phosphoinositide 3-kinase and AKT signaling pathway is frequently enriched in HPV-related  
453 HNSCs and regulates redox metabolism in cancer (58,59). Evidence from the TCGA HNSC

454 dataset demonstrate an association between Nrf2 dysregulation and survival lending support to  
455 the role of Nrf2 in recurrence. Additionally, other metabolic signaling cascades may be playing a  
456 role in driving recurrence warranting further analysis. There is also potential for misclassification  
457 of HPV-status given that we used p16 status as a surrogate marker for HPV-driven disease.  
458 Further work will aim to increase our understanding of mechanisms underlying Nrf2-dependent  
459 OXPHOS inhibitor sensitivity and evaluate the effects of metabolic adaptations on the tumor  
460 microenvironment apropos to driving treatment resistance.

461 In summary, we observed that metachronous recurrent HPV-related HNSCs are  
462 enriched in Nrf2 and OXPHOS signaling dysregulation in an overall metabolic dysregulated  
463 milieu and that Nrf2-enriched HPV-related HNSC displays increased sensitivity to OXPHOS  
464 inhibition. Treatment options for recurrent HPV-related HNSC are limited. IACS-010759 is  
465 currently under investigation in a phase I clinical trial for metastatic or unresectable  
466 malignancies (60). Our data may be used to support the rational use of OXPHOS inhibitors in  
467 patients with Nrf2-enriched, recurrent HPV-related HNSC cancer in a clinical trial providing  
468 expanded options for patients with this devastating disease.

469  
470  
471  
472

473

474

## 475 **Methods**

476 *Data collection.* Clinical data from the University of Pittsburgh tumor samples were abstracted  
477 by study investigators.

478 Archival tissue specimens from the University of Pittsburgh tumor samples were processed  
479 via fixation in 10% neutral buffered formalin, dehydrated in ethanol and embedded with paraffin  
480 wax (FFPE). H&E slides were prepared, and areas with high tumor density (>75% tumor cells)  
481 were marked for extraction. Two-mm punch biopsies were taken from the FFPE tumor dense  
482 regions for downstream tumor RNA extraction. FFPE tissue was de-paraffinized with xylenes,  
483 washed in consecutive ethanol rinses (100% and 70%), and heated to remove formalin cross-  
484 linking (61).

485 Tumor RNA was extracted using the *Quick*-RNA FFPE Miniprep extraction kit (Zymo  
486 Research, Irvine, CA). RNA was quantified using the Qubit™ RNA High Sensitivity Assay Kit  
487 (Thermo Fisher Scientific, Rockford, IL). Sample integrity was evaluated using the Agilent  
488 Bioanalyzer RNA Nano and Pico kits (Agilent Technologies, Santa Clara, CA).

489 *RNA sequencing and alignment.* Sequencing and alignment steps for TCGA data were  
490 described previously (7,62). TCGA RSEM normalized expression data were obtained through  
491 FireBrowse (<http://firebrowse.org/>; `illumina_hiseq_rnaseqv2-RSEM_genes_normalized`).  
492 University of Pittsburgh sample libraries were manually prepared via standard protocols using  
493 the Illumina TruSeq RNA Exome Library Prep Kit (Illumina, San Diego, CA) and sequenced on  
494 an Illumina NextSeq sequencing system using NextSeq 500 Mid- and High-Output 150 cycle  
495 kits (75 bp, paired-end; Illumina, San Diego, CA). Quality control was performed on the raw  
496 reads using RNA-SeQC (v1.1.7). Of the original twelve sets of paired primary and  
497 metachronous recurrent tumors, gene expression data from two pairs were not included in the  
498 downstream analyses due to low quality. Pre-processed short reads were aligned to the human

499 genome reference sequence assembly (GRCh37/hg19) with the STAR2 aligner using a two-  
500 pass procedure.

501 *RNA expression analyses.* FeatureCounts from SubRead (v1.6.0) was used for counting reads.  
502 Differential expression analysis was subsequently performed using the Empirical Analysis of  
503 Digital Gene Expression Data in R program (edgeR) (63,64). Negative binomial generalized log-  
504 linear models were applied to the gene-wise read counts for the metachronous recurrent and  
505 primary tumors adjusting for baseline differences between patients. Likelihood ratio tests were  
506 performed comparing  $\log_2$  counts per million (CPM) between metachronous recurrent and  
507 primary tumors. Differentially expressed genes, defined as  $|\log_2(\text{ratio})| \geq 1$  with the false  
508 discovery rate (FDR) set at 5%, were identified.

509 *Pathway and gene set enrichment analysis.* Gene Set Enrichment Analysis (GSEA; v20.0.5)  
510 was performed using TCGA RSEM expression data and Pittsburgh CPM data in GenePattern  
511 with min and max gene set sizes set to 5 and 1500, respectively (65,66). Single sample GSEA  
512 version 10.0.3 (67) was implemented in GenePattern using  $\log_2$ -transformed, median-centered  
513 expression data with rank normalization. The PANTHER classification system was used for  
514 pathway analysis of the expression data (68-70).

515 *Molecular subtype analysis.* Subtype analysis was performed using the centroids in the gene  
516 expression classifier presented by Walter et al (12) with a reduction from 838 genes to 696  
517 genes in common with Pittsburgh data and the Walter et al centroids. Each tumor was then  
518 assigned to one of the four subtypes (basal, atypical, classical, mesenchymal) by identifying the  
519 nearest centroid using a correlation-based similarity approach.

520 *TCGA survival analysis.* TCGA clinical and genomic data were downloaded from cBioPortal  
521 (71,72). Classification of samples by genomic aberration status (i.e., mutation, copy number  
522 variant, expression) was extracted from cBioPortal. For classification by gene set cluster, TCGA

523 RSEM normalized expression data were clustered using the Consensus Cluster Plus algorithm  
524 to facilitate gene expression cluster assignment (73). Kaplan-Meier survival functions were  
525 stratified either by genomic aberration status or expression cluster status and estimated using  
526 the Survminer package in R (74). In order to manage confounding, Cox proportional hazards  
527 models were fit controlling for age and tumor stage (75) and forest plots used to present the  
528 hazard ratios.

529 *Transcription factor/motif activity analysis.* To analyze activities of transcription factor binding  
530 motifs (TFBM) using RNA-seq data, we used the Integrated System for Motif Activity Response  
531 Analysis (ISMARA) (13).

532 *Cell lines and tumor samples.* HPV-16 expressing HNSC cell lines used in the present study  
533 were: UMSCC47 (isolated from the primary tumor of the lateral tongue of a male patient,  
534 established by Dr. Thomas Carey, University of Michigan), UPCI-SCC90 (from tongue  
535 squamous cell carcinoma (isolated by Dr. Susanne Gollin, University of Pittsburgh) and  
536 93VU147T (squamous cell carcinoma isolated from the floor of mouth). UMSCC47 and  
537 93VU147T cells were maintained in high glucose Dulbecco's Modified Eagle's Medium (DMEM)  
538 while UPCI-SCC90 was cultured in Eagle's Minimum Essential Medium (EMEM) supplemented  
539 with 10%FBS and 1% penicillin/streptomycin mixture. Cells were used for collecting data for 10  
540 passages after thawing and then discarded. All cell lines were authenticated using human  
541 cancer cell line STR profiles. All cell lines were maintained at 37°C in a humidified atmosphere  
542 of 95% air and 5% CO<sub>2</sub>. All human tumor samples were obtained from the University of  
543 Pittsburgh Medical Center in accordance with established University of Pittsburgh IRB  
544 guidelines.

545 *Reagents and Chemicals.* DMEM and EMEM were purchased from GE Healthcare Life  
546 Sciences (Logan, UT). Fetal Bovine Serum (FBS) was obtained from Gemini Bioproducts (West  
547 Sacramento, CA). Penicillin/streptomycin antibiotic mixture was purchased from Invitrogen-Life

548 Technologies (now part of Thermo Fisher Scientific, Waltham, MA). Dimethyl sulfoxide (DMSO),  
549 *N*-acetyl-L-cysteine (NAC), trigonelline, and rotenone were from Sigma-Aldrich (St. Louis, MO).  
550 Cisplatin was from EMD Millipore (now part of Millipore Sigma, Burlington, MA). Apocynin was  
551 purchased from Santa Cruz Biotechnology (Dallas, TX). IACS-010759 was purchased from  
552 Selleckchem (Houston, TX).

553 Stock solution of each compound was stored at -20°C and diluted in culture media  
554 before use. Antibody against Nrf2, HMOX-1, NQO1 and  $\beta$ -tubulin were from Abcam  
555 (Cambridge, MA). Primers were bought from IDT Technologies (Coralville, IA). Nrf2  
556 endoribonuclease-prepared small interfering RNA (esiRNA) was purchased from Sigma-Aldrich  
557 (St. Louis, MO). Kits for RNA isolation and QIAshredder were purchased from Qiagen (Valencia,  
558 CA). iScript RT supermix for RT-qPCR and iQ™ SYBR® Green Supermix for qPCR was from  
559 Bio-Rad Laboratories (Hercules, CA).

560 *Nrf2 overexpressing cell lines.* The Nrf2-expressing retrovirus (MSCV-Nrf2) was a kind gift from  
561 Dr. David Tuveson's laboratory (Cold Spring Harbor, NY). UMSCC47 and UPCI-SCC90 cells  
562 were stably infected with retrovirus expressing empty vector (MSCV-Neo) or Nrf2 (MSCV-Nrf2).  
563 Cells were selected in culture with media supplemented with 200  $\mu$ g G418 for more than 4  
564 weeks. Nrf2 overexpression was confirmed by qPCR.

565 *Nrf2 esiRNA transfection.* Cells were plated in 6-well plates and grown to 70% confluency. Ten  
566  $\mu$ M siRNA was transfected with Lipofectamine RNAiMAX reagent (Invitrogen) according to  
567 manufacturer's instructions before re-plating and analyzing for qPCR or cell proliferation.

568 *Colony formation assay.* About  $2 \times 10^3$  cells were plated in 12-well plates and left in the incubator  
569 for 10-12 days for the development of colonies with or without indicated treatments. Media was  
570 changed twice weekly and cultures were monitored for 7-14 days (depending on growth rate  
571 differences) to allow for Neo cells to reach >50 cells per colony. They were fixed in 4% buffered



572 formalin and stained with crystal violet. The plates were scanned and analyzed in Image J using  
573 the colony area plugin.

574 *Western blotting.* Cells were collected and lysed using appropriate amount of Tris–HCl/EDTA  
575 buffer supplemented with protease and phosphatase inhibitor. Lysates were incubated on ice for  
576 15-20 minutes, sonicated and spun down at maximum speed for 20 mins. After protein  
577 quantification (Bradford's method), lysates were prepared in  $\beta$ -ME and boiled. Between 50-80  
578  $\mu$ g protein was loaded in each lane. Tubulin or vinculin normalization was performed for each  
579 experiment. Immunoreactive bands were visualized and quantified using the LiCor Odyssey  
580 system.

581 *Quantitative real-time PCR (qRT-PCR).* Total RNA from 93VU147T or Nrf2 overexpressing  
582 UMSCC47 and UPCI-SCC90 cells were isolated using RNeasy kit. Tumors were disrupted and  
583 homogenized in the appropriate volume of lysis buffer provided in the RNeasy kit. The tissue  
584 lysate was loaded onto the QIAshredder homogenizer after which RNA was isolated using the  
585 manufacturer's protocol. First-strand cDNA was synthesized using iScript RT and qPCR was  
586 done using suitable dilution of cDNA. RT conditions: 15 sec denaturation/95°C, 30 sec  
587 annealing/60°C, and 30 sec extension/72°C for 40 cycles. Relative quantification was performed  
588 using the  $2^{-\Delta\Delta Cq}$  method.

589 Primer sequences for target genes are as follows:

590 Nrf2

591 Forward 5'-CGG TAT GCA ACA GGA CAT TG-3'

592 Reverse 5'-ACT GGT TGG GGT CTT CTG TG-3'

593 HMOX1

594 Forward 5'-GAGACGGCTTCAAGCTGGTGAT-3'

595 Reverse 5'-CCGTACCAGAAGGCCAGGTC-3'

596 NQO1

597 Forward 5'-CGC AGA CCT TGT GAT ATT CCA G-3'

598 Reverse 5'-CGT TTC TTC CAT CCT TCC AGG-3'

599 *Cell proliferation assay.* We plated  $2.5 - 5 \times 10^4$  cells in 96-well plates and allowed to attach  
600 overnight. After indicated treatments, 10  $\mu$ l premix WST-1 cell proliferation reagent (Takara Bio  
601 Inc, Clontech Laboratories, Inc.) was added to each well, and the plate was returned to  
602 incubator for 2 hours after which absorbance was read at 450 nm in a microplate reader (BioTek  
603 Instruments Inc).

604 *Amplex Red assay.* UMSCC47 and UPCI-SCC90 cells expressing Neo and Nrf2 cells were  
605 used to determine the extracellular  $H_2O_2$  using 10-acetyl-3,7-dihydroxyphenoxazine (Amplex  
606 Red Hydrogen Peroxide Assay kit from Molecular Probes Inc., Eugene, OR) following the  
607 manufacturer's instructions. Approximately  $25 \times 10^3$  cells/well were plated in 96-black well plates  
608 and allowed to attach overnight. After NAC (20 mM) or apocynin (100  $\mu$ M) treatment for 2-3h,  
609 cells were washed once in PBS, then incubated for 30 minutes at 37°C in reaction buffer  
610 containing 0.2 U/mL horseradish peroxidase and 100  $\mu$ M Amplex Red. Wells containing all  
611 reactants except samples were run in parallel to account for background fluorescence.  
612 Fluorescence was expressed as  $H_2O_2$  released using a standard curve generated with known  
613 concentrations of  $H_2O_2$  stabilized solution using the Synergy H1 Hybrid microplate reader from  
614 BioTek at excitation of 530 nm and emission of 590 nm. Cells were then counterstained with  
615 crystal violet to correct the  $H_2O_2$  released values for variations in cell culture densities.

616 *MitoSOX assay.* Detection of mitochondrial superoxide in live cells was done using MitoSOX™  
617 Red (Molecular Probes Inc., Eugene, OR). We cultured 25,000 cells in 96-well plate and  
618 washed the cells with PBS, then incubated the plates with 5  $\mu$ M MitoSOX in PBS for 30 minutes

619 at 37°C. Following incubation in the dark, MitoSOX was removed, cells were washed again with  
620 PBS and then plates were read in Synergy H1 Hybrid microplate reader from BioTek at  
621 excitation of 510 nm and emission of 595 nm.

622 *ATP production.* The ATP-monitoring ATPlite luminescence assay system from Perkin Elmer  
623 Inc. (Waltham, MA) was used for quantitative evaluation of proliferation in cultured UMSCC47  
624 and UPCI-SCC90 cells. Briefly, 25x10<sup>3</sup> cells/well were plated in 96-black well plates and allowed  
625 to attach overnight. After appropriate treatments, luminescence was read on a Synergy H1  
626 Hybrid microplate reader (BioTek). ATP production was measured by ATPlite™ assay using  
627 standard curve of ATP and further normalization with cell count. IACS-010759 applied at 10nM  
628 (24h), rotenone at 10μM (2h followed by rescue in regular DMEM media for 24h) and 20μM  
629 FCCP (30'). Each experiment was repeated three times and combined data of mean ± SEM are  
630 illustrated.

631 *Tetramethylrhodamine ethyl ester (TMRE) assay.* The TMRE-Mitochondrial Membrane Potential  
632 Assay Kit (Abcam, Cambridge, MA) was used for quantifying changes in mitochondrial  
633 membrane potential in live cells using a Synergy H1 Hybrid microplate reader (BioTek,  
634 Winooski, VT). The assay implements FCCP (carbonyl cyanide 4-(trifluoromethoxy)  
635 phenylhydrazone), an ionophore uncoupler of oxidative phosphorylation, as positive control.  
636 Adherent and live cells are stained for 15-20 minutes with or without FCCP, after which TMRE  
637 staining is measured by microplate spectrophotometry (excitation/emission 549/575 nm).

638 *In vivo xenograft studies.* The animal experiment protocol was approved by the Institutional  
639 Animal Care and Use Committee of the University of Pittsburgh. A total of 2x10<sup>6</sup> UMSCC47-Neo  
640 and UMSCC47-Nrf2 overexpressing cells mixed with matrigel were injected subcutaneously into  
641 either flank of NOD SCID mice aged 5-8 weeks (N=6-8 tumors/ group). Tumor volume was  
642 measured once a week using calipers and was calculated using the formula:  $V = \frac{W^2 \times L}{2}$  (76).

643 Two-way ANOVA with Sidak's test used to test for differences in mean tumor volume between  
644 Neo and Nrf2 groups over time. Bars represent the mean  $\pm$  SEM. \*, p-value < 0.01; \*\*\*, p-value  
645 < 0.0001.

646 *Statistics.* R programming software (version 3.6.1) was used to perform statistical analyses  
647 (77). To account for multiple hypothesis testing, the false discovery rate was controlled using  
648 the method of Benjamini and Hochberg. In GSEA analyses, hypothesis generating q-values <  
649 0.25 were used to determine if findings were statistically significant. In survival analyses, log-  
650 rank test p-values less than 0.05 were used to determine if findings were statistically significant.  
651 All other analyses used an alpha of 0.05 to test for statistical significance. All *in vitro*  
652 experiments were repeated 2-3 times. Representative data from CFA are shown with  
653 quantitation from all experiments. Difference between group means was tested with Student's t-  
654 test. \*, p-value < 0.05; \*\*, p-value < 0.001; \*\*\*, p-value < 0.0001.

655 *Study approval.* This study protocol was reviewed and approved by the University of  
656 Pittsburgh Institutional Review Board (IRB 99-069). Written consent was obtained for genomic  
657 characterization of tumor tissues for all participants prior to inclusion in this study. This study  
658 abided by the Declaration of Helsinki principles.

659

## 660 **Author Contributions**

661 U.D., E.M., R.A.H., D.F., and A.V. conceived the experiment. M.K., D.F., and A.V. collected the  
662 data. R.A.H., A.V., Q.Z., D.F., and D.P. analyzed the data. R.A.H., A.V., Q.Z., D.F., D.P., H.O.,  
663 and U.D. interpreted the data. R.A.H. and A.V. drafted the article. All authors participated in  
664 critical revision of the article. R.A.H., A.V., and U.D. were involved in final approval of the article.

## 665 **Acknowledgements**

666 We thank Dr. Jeffrey Delrow of the Fred Hutchinson Cancer Research Center for bioinformatics  
667 analysis design support. We thank Dr. William LaFramboise for RNA sequencing support.

668 **Figures and Figure Legends**

669

670

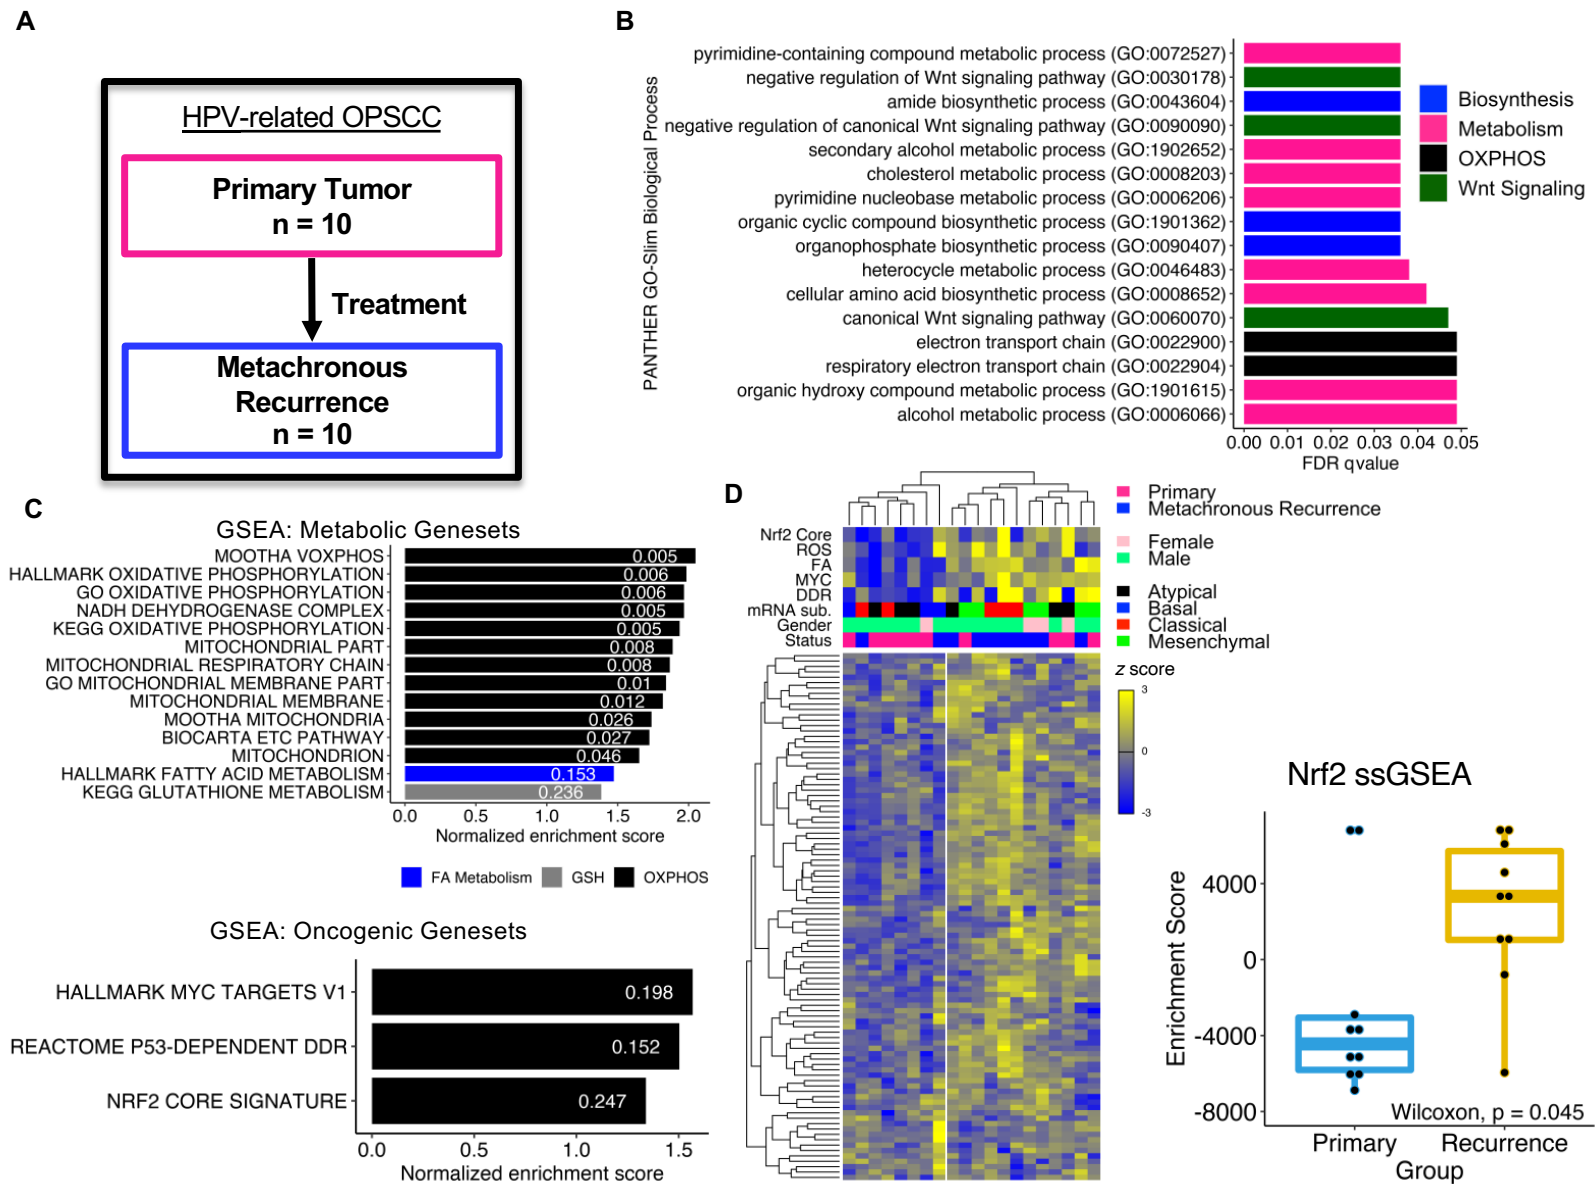



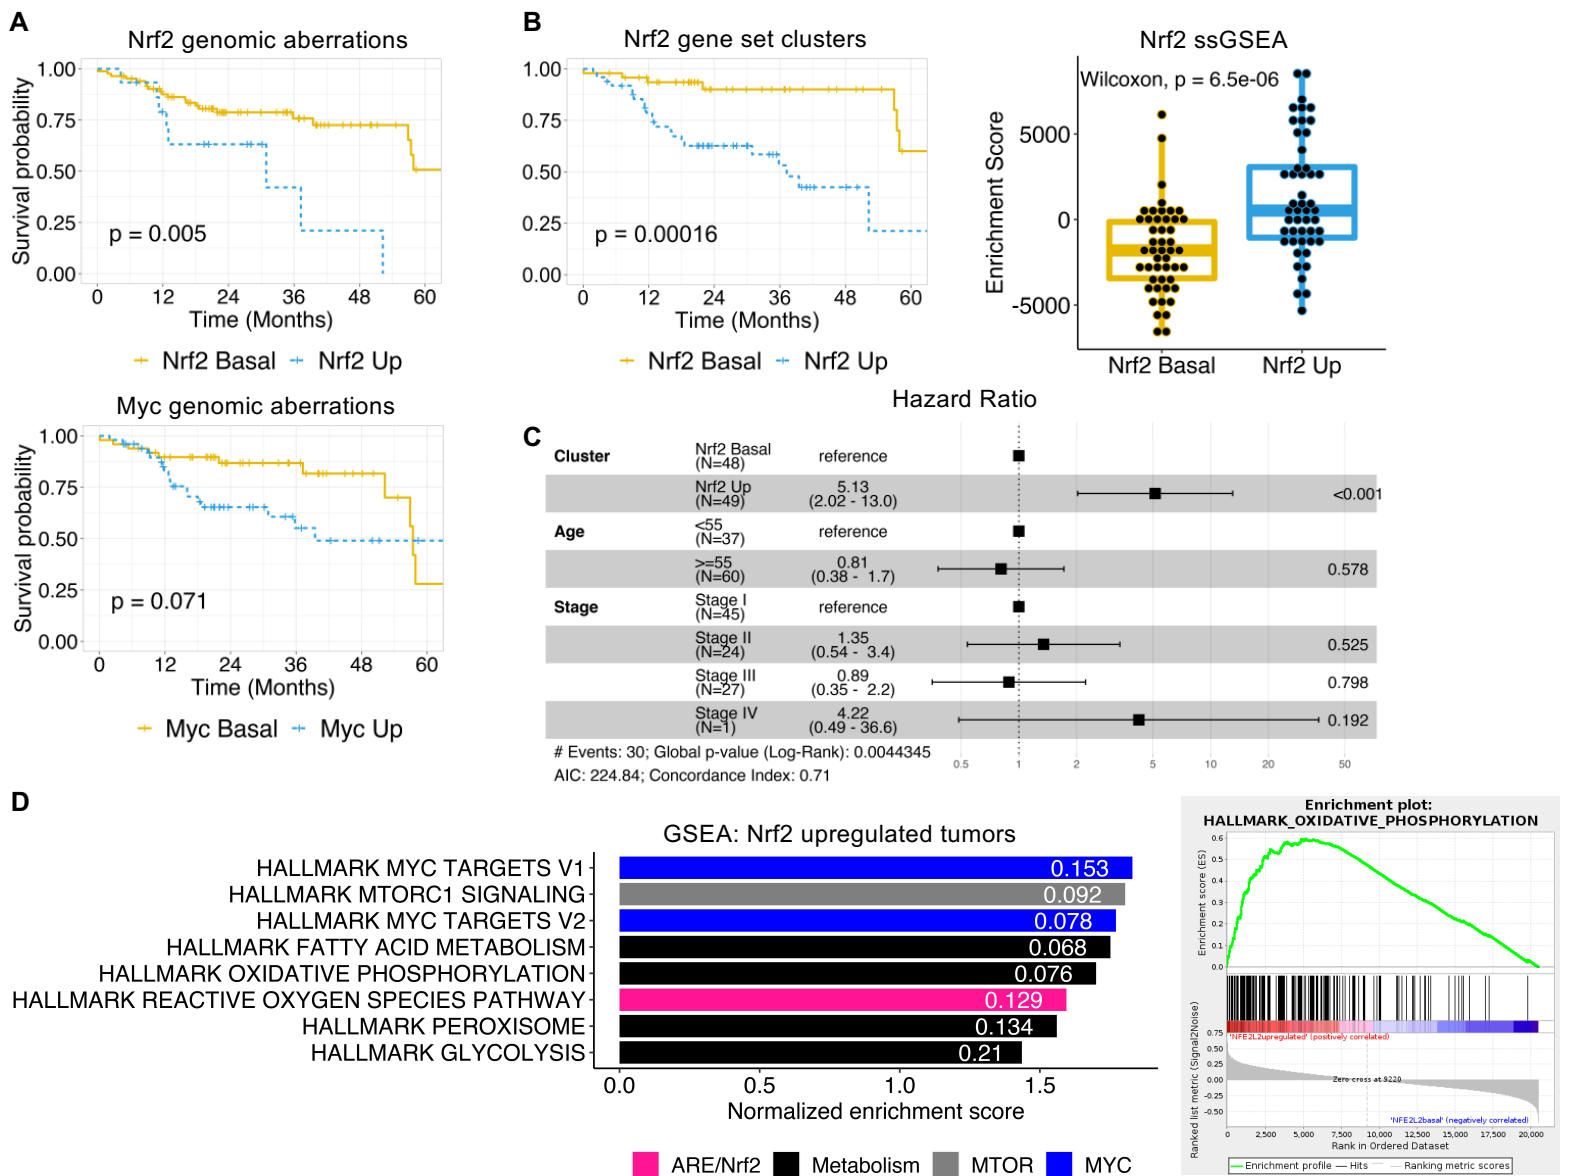

**Figure 2. Nrf2 activation decreases survival among TCGA HPV-related head and neck squamous cell carcinomas (HNSC).** (A) Survival stratified by Nrf2 (*top panel*) or Myc (*bottom panel*) genomic alteration status (*Up*: gene expression > 2, mutation, copy number gain or amplification; *Basal*: gene expression ≤ 2, no mutation, copy neutral). Log-rank global p-value labeled. (B) *Left panel*: Survival stratified by Nrf2 status as determined by clustering TCGA HPV-related HNSC samples on Singh *NFE2L2* gene set expression. Log-rank p-value labeled. *Right panel*: Singh *NFE2L2* ssGSEA enrichment scores stratified by gene set cluster membership as assigned in clustering analysis. (C) Cox regression hazard ratio by Nrf2 gene set expression cluster, age group, and tumor stage (AJCC 8th edition, clinical staging). Point estimates plotted with 95% confidence intervals represented by whiskers. P-values for each hazard ratio by predictor are represented on the far right of plot. (D) *Left panel*: GSEA of TCGA HPV-related HNSC Nrf2 upregulated tumors as defined in (A; *top panel*). FDR q-values labeled within bars. *Right panel*: Hallmark oxidative phosphorylation gene set enrichment plot.

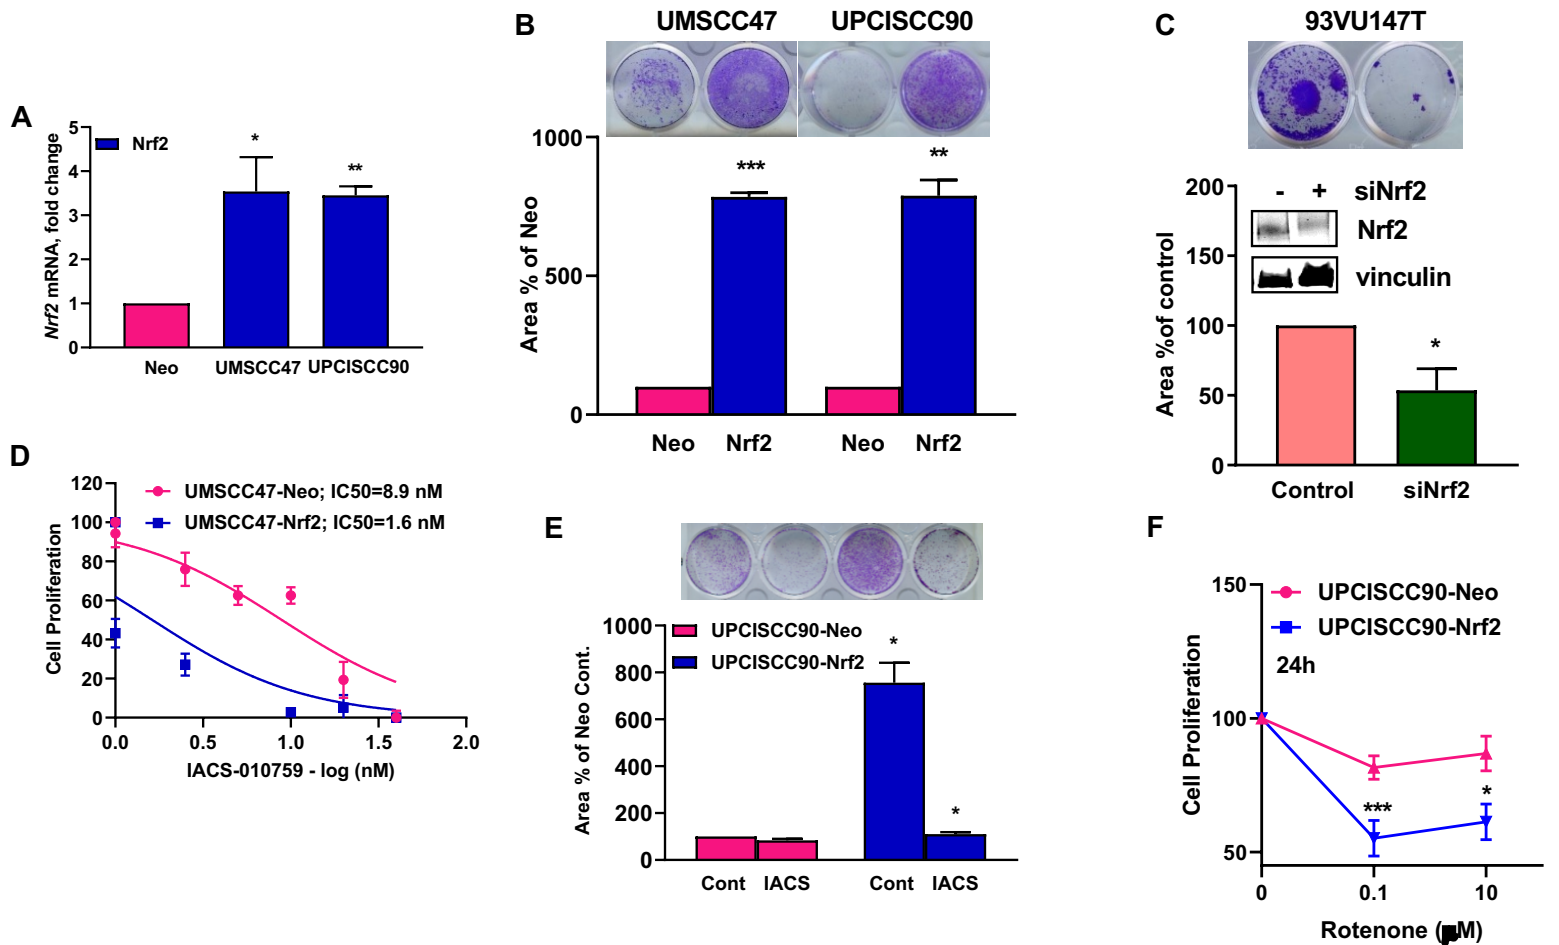

**Figure 3. Nrf2 promotes cell proliferation in OXPHOS-dependent manner in HPV-positive HNSC cells.** (A) qPCR demonstrates overexpression of Nrf2 after retroviral stable infection. (B) Representative image (upper) of colony formation assay (CFA) and quantification (lower) in stably expressing empty vector (Neo) or Nrf2 cells. (C) Representative picture (upper) of CFA and quantification (lower) in 93VU147T after transient Nrf2 knockdown. (D) Cell proliferation assay for IACS-010759 (IACS)-treated UMSCC47-Neo and -Nrf2 cells measured after 24h of treatment (representative data from 3 experiments). (E) CFA after treatment with IACS in UPCISCC90-Neo and -Nrf2 cells. (F) Cell proliferation in UPCISCC90-Neo and Nrf2-cells after treatment with 0.1 or 10 µM rotenone. Results represent mean ± standard error of the mean (SEM).

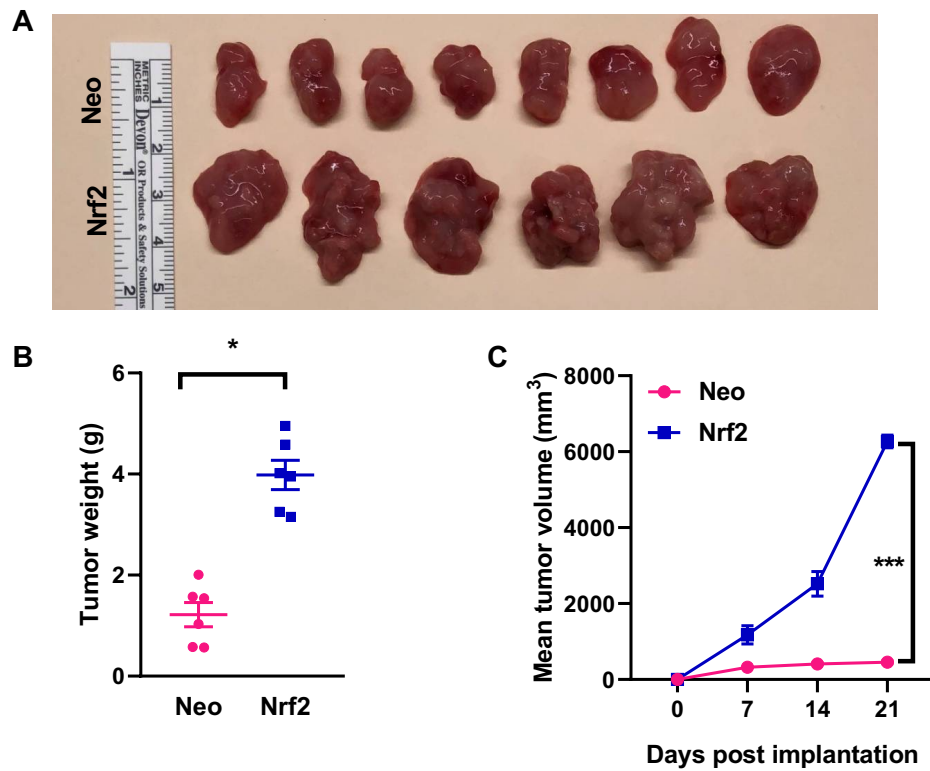

**Figure 4. Nrf2 overexpressing xenografts exhibit enhanced growth.** Both flanks of NOD/SCID mice were injected subcutaneously with UMSCC47-Neo and -Nrf2 cells and tumor volumes were measured weekly. **(A)** Images of harvested UMSCC47 tumors are demonstrated for each group. **(B)** Tumor weights collected on day 21 post-implantation. Difference in mean tumor weights between groups compared using Student's t-test. **(C)** UMSCC47 tumor growth over time.

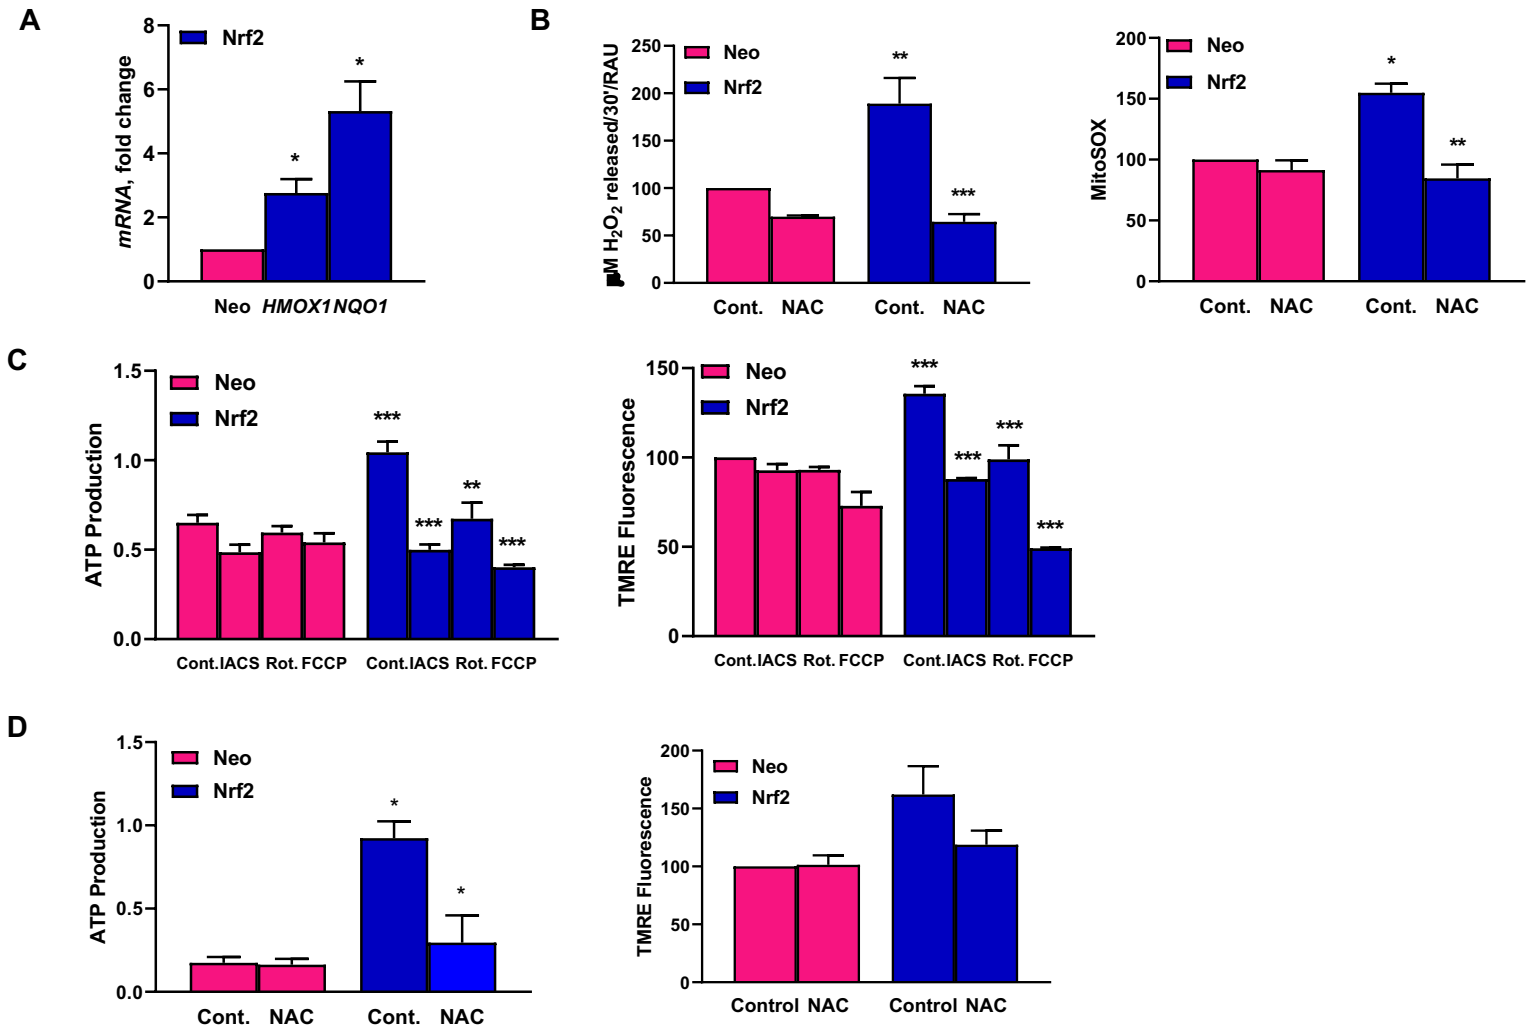

**Figure 5. Nrf2 activation upregulates mitochondrial activity in a ROS-dependent manner.** (A) qPCR for *HMOX1* and *NQO1* in Neo and Nrf2-expressing UMSCC47 cells. (B) *Left panel*: ROS (H<sub>2</sub>O<sub>2</sub> released) measured in cells treated with and without 10mM N-acetyl cysteine (NAC) for 3h. *Right panel*: Mitochondrial superoxide measured in control versus 10mM NAC (3h)-treated cells via MitoSOX Red. (C) Nrf2 promotes ATP production and is dependent on mitochondria. *Left panel*: Nrf2 driven ATP production is abrogated upon treatment with mitochondrial inhibitors. *Right panel*: Mitochondrial membrane potential measured using TMRE dye. (D) Nrf2 drives ATP production via ROS production (*left panel*) and TMRE fluorescence (*right panel*) measured in cells treated with and without 10mM NAC (3h).

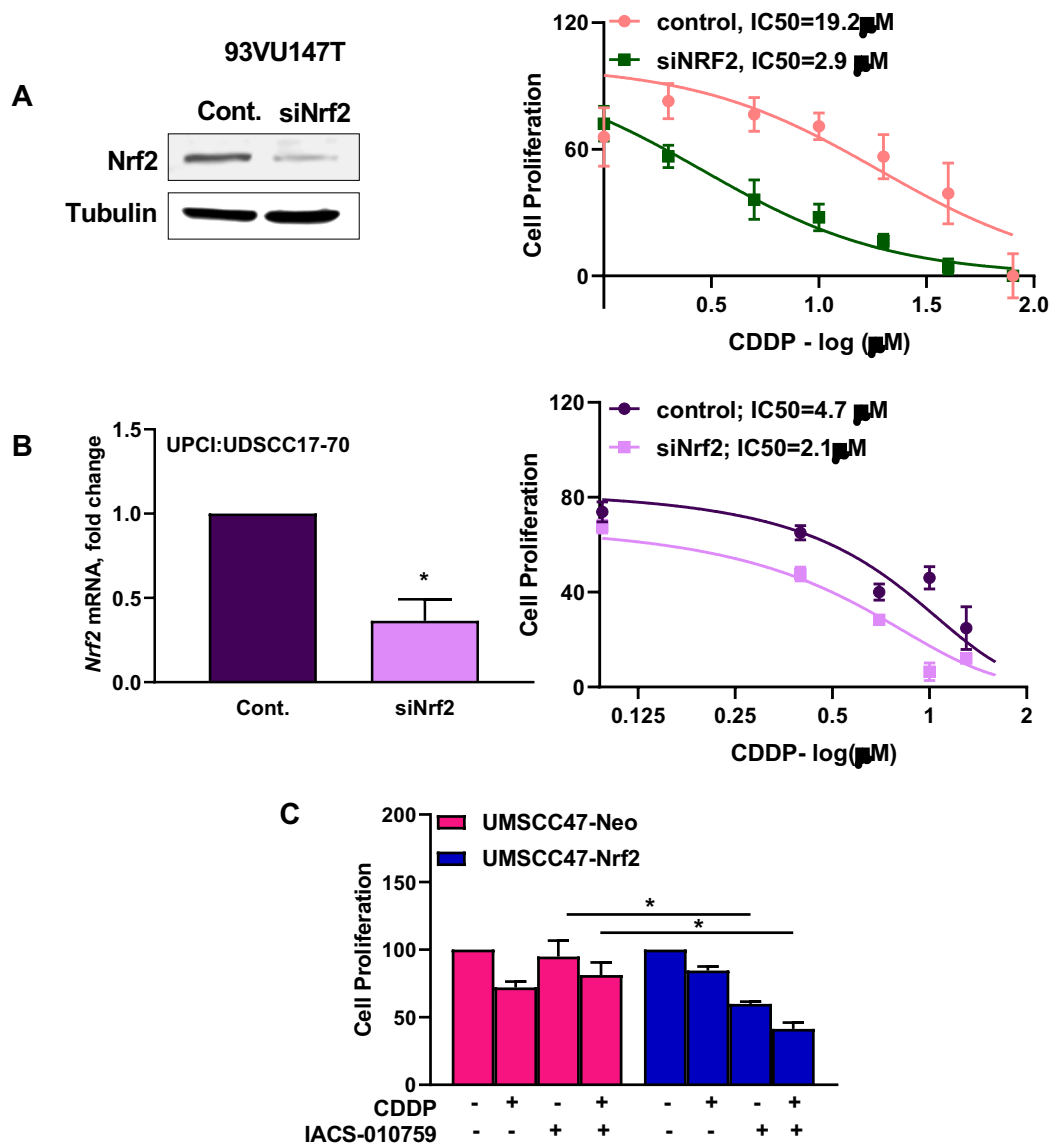

**Figure 6. Nrf2 status mediates cisplatin sensitivity synergistically with OXPHOS inhibition in HPV-positive HNSC cells. (A)** Western blot for Nrf2 in 93VU147T after transient transfection with siNrf2 for 24h (left panel). Cell proliferation in 93VU147T cells measured after Nrf2 knockdown (right panel). **(B)** Nrf2 knock-down sensitizes primary tumor cells to cisplatin. *Left panel:* qRT-PCR for Nrf2 in the primary cell line, UPCI:UDSCC17-70, after transient transfection with siNrf2 for 24h (left panel). *Right panel:* Cell proliferation in CDDP-treated UPCI:UDSCC17-70 cells in control and Nrf2 knockdown conditions. **(C)** Complex I inhibition is synthetically lethal with cisplatin in Nrf2 overexpressing cells. UMSCC47-Neo and -Nrf2 cells were treated with 10µM CDDP, 100 nM IACS, or combination for 24h. Differences in means calculated using one-way ANOVA with Tukey's test.

## 671 References

- 672 1. Ang KK, et al. Human papillomavirus and survival of patients with oropharyngeal cancer. *N Engl J*  
673 *Med.* 2010;363(1):24-35.
- 674 2. Fakhry C, et al. Human papillomavirus and overall survival after progression of oropharyngeal  
675 squamous cell carcinoma. *J Clin Oncol.* 2014;32(30):3365-3373.
- 676 3. Chaturvedi AK, et al. Human papillomavirus and rising oropharyngeal cancer incidence in the  
677 United States. *J Clin Oncol.* 2011;29(32):4294-4301.
- 678 4. Gillison ML, Chaturvedi AK, Anderson WF, Fakhry C. Epidemiology of Human Papillomavirus-  
679 Positive Head and Neck Squamous Cell Carcinoma. *J Clin Oncol.* 2015;33(29):3235-3242.
- 680 5. Harbison RA, et al. The mutational landscape of recurrent versus nonrecurrent human  
681 papillomavirus-related oropharyngeal cancer. *JCI Insight.* 2018;3(14).
- 682 6. Gleber-Netto FO, et al. Variations in HPV function are associated with survival in squamous cell  
683 carcinoma. *JCI Insight.* 2019;4(1).
- 684 7. Comprehensive genomic characterization of head and neck squamous cell carcinomas. *Nature.*  
685 2015;517(7536):576-582.
- 686 8. Jiang T, et al. High levels of Nrf2 determine chemoresistance in type II endometrial cancer.  
687 *Cancer Res.* 2010;70(13):5486-5496.
- 688 9. Eckhardt M, et al. Multiple Routes to Oncogenesis Are Promoted by the Human Papillomavirus-  
689 Host Protein Network. *Cancer Discov.* 2018;8(11):1474-1489.
- 690 10. Amin N, et al. *AJCC Cancer Staging Manual, 8th Edition.*: Springer; 2017.
- 691 11. Fox DB, et al. NRF2 activation promotes the recurrence of dormant tumour cells through  
692 regulation of redox and nucleotide metabolism. *Nature Metabolism.* 2020;2(4):318-334.
- 693 12. Walter V, et al. Molecular subtypes in head and neck cancer exhibit distinct patterns of  
694 chromosomal gain and loss of canonical cancer genes. *PLoS One.* 2013;8(2):e56823.
- 695 13. Balwiercz PJ, Pachkov M, Arnold P, Gruber AJ, Zavolan M, van Nimwegen E. ISMARA: automated  
696 modeling of genomic signals as a democracy of regulatory motifs. *Genome Res.* 2014;24(5):869-  
697 884.
- 698 14. Arfmann-Knubel S, et al. The Crosstalk between Nrf2 and TGF-beta1 in the Epithelial-  
699 Mesenchymal Transition of Pancreatic Duct Epithelial Cells. *PLoS One.* 2015;10(7):e0132978.
- 700 15. Hamabe A, et al. Role of pyruvate kinase M2 in transcriptional regulation leading to epithelial-  
701 mesenchymal transition. *Proc Natl Acad Sci U S A.* 2014;111(43):15526-15531.
- 702 16. Singh A, et al. RNAi-mediated silencing of nuclear factor erythroid-2-related factor 2 gene  
703 expression in non-small cell lung cancer inhibits tumor growth and increases efficacy of  
704 chemotherapy. *Cancer Res.* 2008;68(19):7975-7984.
- 705 17. Wang XJ, et al. Nrf2 enhances resistance of cancer cells to chemotherapeutic drugs, the dark  
706 side of Nrf2. *Carcinogenesis.* 2008;29(6):1235-1243.
- 707 18. Silva MM, Rocha CRR, Kinker GS, Pelegrini AL, Menck CFM. The balance between NRF2/GSH  
708 antioxidant mediated pathway and DNA repair modulates cisplatin resistance in lung cancer  
709 cells. *Scientific Reports.* 2019;9(1):17639.
- 710 19. Roh JL, Kim EH, Jang H, Shin D. Nrf2 inhibition reverses the resistance of cisplatin-resistant head  
711 and neck cancer cells to artesunate-induced ferroptosis. *Redox Biol.* 2017;11:254-262.
- 712 20. Ren D, et al. Brusatol enhances the efficacy of chemotherapy by inhibiting the Nrf2-mediated  
713 defense mechanism. *Proc Natl Acad Sci U S A.* 2011;108(4):1433-1438.
- 714 21. Zevallos JP, Mazul AL, Walter V, Hayes DN. Gene Expression Subtype Predicts Nodal Metastasis  
715 and Survival in Human Papillomavirus-Negative Head and Neck Cancer. *Laryngoscope.*  
716 2019;129(1):154-161.

- 717 22. National Comprehensive Cancer Network. Head and Neck Cancers (Version 1.2020).  
718 [https://www.nccn.org/professionals/physician\\_gls/pdf/head-and-neck.pdf](https://www.nccn.org/professionals/physician_gls/pdf/head-and-neck.pdf). Accessed April 7,  
719 2020.
- 720 23. Zhan KY, et al. National treatment trends in human papillomavirus-positive oropharyngeal  
721 squamous cell carcinoma. *Cancer*. 2020;126(6):1295-1305.
- 722 24. Takiar V, et al. Reirradiation of Head and Neck Cancers With Intensity Modulated Radiation  
723 Therapy: Outcomes and Analyses. *Int J Radiat Oncol Biol Phys*. 2016;95(4):1117-1131.
- 724 25. Dinkova-Kostova AT, Abramov AY. The emerging role of Nrf2 in mitochondrial function. *Free  
725 Radic Biol Med*. 2015;88(Pt B):179-188.
- 726 26. Calkins MJ, Jakel RJ, Johnson DA, Chan K, Kan YW, Johnson JA. Protection from mitochondrial  
727 complex II inhibition in vitro and in vivo by Nrf2-mediated transcription. *Proc Natl Acad Sci U S A*.  
728 2005;102(1):244-249.
- 729 27. Holmstrom KM, et al. Nrf2 impacts cellular bioenergetics by controlling substrate availability for  
730 mitochondrial respiration. *Biol Open*. 2013;2(8):761-770.
- 731 28. Kim TH, et al. NRF2 blockade suppresses colon tumor angiogenesis by inhibiting hypoxia-induced  
732 activation of HIF-1 $\alpha$ . *Cancer Res*. 2011;71(6):2260-2275.
- 733 29. Agyeman AS, et al. Transcriptomic and proteomic profiling of KEAP1 disrupted and  
734 sulforaphane-treated human breast epithelial cells reveals common expression profiles. *Breast  
735 Cancer Res Treat*. 2012;132(1):175-187.
- 736 30. Piantadosi CA, et al. Heme oxygenase-1 couples activation of mitochondrial biogenesis to anti-  
737 inflammatory cytokine expression. *J Biol Chem*. 2011;286(18):16374-16385.
- 738 31. Hota KB, Hota SK, Chaurasia OP, Singh SB. Acetyl-L-carnitine-mediated neuroprotection during  
739 hypoxia is attributed to ERK1/2-Nrf2-regulated mitochondrial biosynthesis. *Hippocampus*.  
740 2012;22(4):723-736.
- 741 32. Athale J, et al. Nrf2 promotes alveolar mitochondrial biogenesis and resolution of lung injury in  
742 *Staphylococcus aureus* pneumonia in mice. *Free Radic Biol Med*. 2012;53(8):1584-1594.
- 743 33. Zhang YK, Wu KC, Klaassen CD. Genetic activation of Nrf2 protects against fasting-induced  
744 oxidative stress in livers of mice. *PLoS One*. 2013;8(3):e59122.
- 745 34. Uruno A, et al. The Keap1-Nrf2 system prevents onset of diabetes mellitus. *Mol Cell Biol*.  
746 2013;33(15):2996-3010.
- 747 35. Ma Q. Role of nrf2 in oxidative stress and toxicity. *Annu Rev Pharmacol Toxicol*. 2013;53:401-  
748 426.
- 749 36. Baird L, Dinkova-Kostova AT. The cytoprotective role of the Keap1-Nrf2 pathway. *Arch Toxicol*.  
750 2011;85(4):241-272.
- 751 37. Furfaro AL, et al. The Nrf2/HO-1 Axis in Cancer Cell Growth and Chemoresistance. *Oxid Med Cell  
752 Longev*. 2016;2016:1958174.
- 753 38. Zhang Z, Xiong R, Li C, Xu M, Guo M. LncRNA TUG1 promotes cisplatin resistance in esophageal  
754 squamous cell carcinoma cells by regulating Nrf2. *Acta Biochim Biophys Sin (Shanghai)*.  
755 2019;51(8):826-833.
- 756 39. Fan Z, et al. Nrf2-Keap1 pathway promotes cell proliferation and diminishes ferroptosis.  
757 *Oncogenesis*. 2017;6(8):e371.
- 758 40. Probst BL, McCauley L, Trevino I, Wigley WC, Ferguson DA. Cancer Cell Growth Is Differentially  
759 Affected by Constitutive Activation of NRF2 by KEAP1 Deletion and Pharmacological Activation  
760 of NRF2 by the Synthetic Triterpenoid, RTA 405. *PLoS One*. 2015;10(8):e0135257.
- 761 41. Tao S, et al. Oncogenic KRAS confers chemoresistance by upregulating NRF2. *Cancer Res*.  
762 2014;74(24):7430-7441.
- 763 42. Shaulian E, Karin M. AP-1 as a regulator of cell life and death. *Nat Cell Biol*. 2002;4(5):E131-136.

- 764 43. DeNicola GM, et al. Oncogene-induced Nrf2 transcription promotes ROS detoxification and  
765 tumorigenesis. *Nature*. 2011;475(7354):106-109.
- 766 44. Diebold L, Chandel NS. Mitochondrial ROS regulation of proliferating cells. *Free Radic Biol Med*.  
767 2016;100:86-93.
- 768 45. Schieber M, Chandel NS. ROS function in redox signaling and oxidative stress. *Curr Biol*.  
769 2014;24(10):R453-462.
- 770 46. Yang Y, et al. Mitochondria and Mitochondrial ROS in Cancer: Novel Targets for Anticancer  
771 Therapy. *J Cell Physiol*. 2016;231(12):2570-2581.
- 772 47. Dang CV. MYC, metabolism, cell growth, and tumorigenesis. *Cold Spring Harb Perspect Med*.  
773 2013;3(8).
- 774 48. Dinkova-Kostova AT, Baird L, Holmstrom KM, Meyer CJ, Abramov AY. The spatiotemporal  
775 regulation of the Keap1-Nrf2 pathway and its importance in cellular bioenergetics. *Biochem Soc  
776 Trans*. 2015;43(4):602-610.
- 777 49. Holmstrom KM, Kostov RV, Dinkova-Kostova AT. The multifaceted role of Nrf2 in mitochondrial  
778 function. *Curr Opin Toxicol*. 2016;1:80-91.
- 779 50. Namani A, Cui QQ, Wu Y, Wang H, Wang XJ, Tang X. NRF2-regulated metabolic gene signature as  
780 a prognostic biomarker in non-small cell lung cancer. *Oncotarget*. 2017;8(41):69847-69862.
- 781 51. Namani A, Matiur Rahaman M, Chen M, Tang X. Gene-expression signature regulated by the  
782 KEAP1-NRF2-CUL3 axis is associated with a poor prognosis in head and neck squamous cell  
783 cancer. *BMC cancer*. 2018;18(1):46-46.
- 784 52. Fu J, et al. Hyperactivity of the transcription factor Nrf2 causes metabolic reprogramming in  
785 mouse esophagus. *J Biol Chem*. 2019;294(1):327-340.
- 786 53. Matassa DS, et al. Oxidative metabolism drives inflammation-induced platinum resistance in  
787 human ovarian cancer. *Cell Death Differ*. 2016;23(9):1542-1554.
- 788 54. Zhang L, et al. Metabolic reprogramming toward oxidative phosphorylation identifies a  
789 therapeutic target for mantle cell lymphoma. *Sci Transl Med*. 2019;11(491).
- 790 55. Echeverria GV, et al. Resistance to neoadjuvant chemotherapy in triple-negative breast cancer  
791 mediated by a reversible drug-tolerant state. *Sci Transl Med*. 2019;11(488).
- 792 56. Khan AUH, et al. Mitochondrial Complex I activity signals antioxidant response through ERK5. *Sci  
793 Rep*. 2018;8(1):7420.
- 794 57. Mroz EA, Tward AD, Hammon RJ, Ren Y, Rocco JW. Intra-tumor genetic heterogeneity and  
795 mortality in head and neck cancer: analysis of data from the Cancer Genome Atlas. *PLoS Med*.  
796 2015;12(2):e1001786.
- 797 58. Chatterjee S, et al. Membrane depolarization is the trigger for PI3K/Akt activation and leads to  
798 the generation of ROS. *Am J Physiol Heart Circ Physiol*. 2012;302(1):H105-114.
- 799 59. Koundouros N, Pouligiannis G. Phosphoinositide 3-Kinase/Akt Signaling and Redox Metabolism  
800 in Cancer. *Front Oncol*. 2018;8:160.
- 801 60. ClinicalTrials.gov. Identifier: NCT03291938, IACS-010759 in Advanced Cancers. National Library  
802 of Medicine. <https://clinicaltrials.gov/ct2/show/NCT03291938>. Accessed 4/8/2020.
- 803 61. Shi SR, et al. DNA extraction from archival formalin-fixed, paraffin-embedded tissues: heat-  
804 induced retrieval in alkaline solution. *Histochem Cell Biol*. 2004;122(3):211-218.
- 805 62. Morris LG, et al. The molecular landscape of recurrent and metastatic head and neck cancers:  
806 insights from a precision oncology sequencing platform. *JAMA Oncol*. 2016.
- 807 63. Robinson MD, McCarthy DJ, Smyth GK. edgeR: a Bioconductor package for differential  
808 expression analysis of digital gene expression data. *Bioinformatics*. 2010;26(1):139-140.
- 809 64. McCarthy DJ, Chen Y, Smyth GK. Differential expression analysis of multifactor RNA-Seq  
810 experiments with respect to biological variation. *Nucleic Acids Res*. 2012;40(10):4288-4297.



- 811 65. Subramanian A, et al. Gene set enrichment analysis: a knowledge-based approach for  
812 interpreting genome-wide expression profiles. *Proc Natl Acad Sci U S A*. 2005;102(43):15545-  
813 15550.
- 814 66. Reich M, Liefeld T, Gould J, Lerner J, Tamayo P, Mesirov JP. GenePattern 2.0. *Nat Genet*.  
815 2006;38(5):500-501.
- 816 67. Barbie DA, et al. Systematic RNA interference reveals that oncogenic KRAS-driven cancers  
817 require TBK1. *Nature*. 2009;462(7269):108-112.
- 818 68. Mi H, Muruganujan A, Ebert D, Huang X, Thomas PD. PANTHER version 14: more genomes, a  
819 new PANTHER GO-slim and improvements in enrichment analysis tools. *Nucleic Acids Res*.  
820 2019;47(D1):D419-d426.
- 821 69. Mi H, et al. Protocol Update for large-scale genome and gene function analysis with the  
822 PANTHER classification system (v.14.0). *Nat Protoc*. 2019;14(3):703-721.
- 823 70. Thomas PD, et al. Applications for protein sequence-function evolution data: mRNA/protein  
824 expression analysis and coding SNP scoring tools. *Nucleic Acids Res*. 2006;34(Web Server  
825 issue):W645-650.
- 826 71. Cerami E, et al. The cBio cancer genomics portal: an open platform for exploring  
827 multidimensional cancer genomics data. *Cancer Discov*. 2012;2(5):401-404.
- 828 72. Gao J, et al. Integrative analysis of complex cancer genomics and clinical profiles using the  
829 cBioPortal. *Sci Signal*. 2013;6(269):pl1.
- 830 73. Wilkerson MD, Hayes DN. ConsensusClusterPlus: a class discovery tool with confidence  
831 assessments and item tracking. *Bioinformatics*. 2010;26(12):1572-1573.
- 832 74. Kassambara A, Kosinski M, Biecek P. survminer: Drawing Survival Curves using 'ggplot2'. R  
833 package version 0.4.6. 2019.
- 834 75. Therneau T. A Package for Survival Analysis in R. R package version 3.1.12. 2020.
- 835 76. Bousquet PF, et al. Preclinical evaluation of LU 79553: a novel bis-naphthalimide with potent  
836 antitumor activity. *Cancer Res*. 1995;55(5):1176-1180.
- 837 77. *R: A language and environment for statistical computing*. R Foundation for Statistical Computing.  
838 [computer program]. Vienna, Austria.2019.
- 839
